# Supplementary material for: The Cl--channel TMEM16A is involved in the generation of cochlear Ca2+ waves and promotes the refinement of auditory brainstem networks in mice
Source: eLife. 2022 Feb 7;11:e72251. doi: 10.7554/eLife.72251 (PMC8871368; doi:10.7554/eLife.72251)
Supplement: Figure 1—figure supplement 2—source data 1. [file elife-72251-fig1-figsupp2-data1.xlsx]

## Sheet: Ca2+ Imaging Suramin
	WT Area (Hz) before Suramin	WT Area (Hz) after Suramin		cKO Area (Hz) before Suramin	cKO Area (Hz) after Suramin		WT1 Area (Hz) before Suramin	WT1 Area (Hz) after Suramin		WT2 Area (Hz) before Suramin	WT2 Area (Hz) after Suramin		WT3 Area (Hz) before Suramin	WT3 Area (Hz) after Suramin		WT4 Area (Hz) before Suramin	WT4 Area (Hz) after Suramin		WT5 Area (Hz) before Suramin	WT5 Area (Hz) after Suramin		WT6 Area (Hz) before Suramin	WT6 Area (Hz) after Suramin		cKO1 Area (Hz) before Suramin	cKO1 Area (Hz) after Suramin		cKO2 Area (Hz) before Suramin	cKO2 Area (Hz) after Suramin		cKO3 Area (Hz) before Suramin	cKO3 Area (Hz) after Suramin		cKO4 Area (Hz) before Suramin	cKO4 Area (Hz) after Suramin		cKO5 Area (Hz) before Suramin	cKO5 Area (Hz) after Suramin		cKO5 Area (Hz) before Suramin	cKO5 Area (Hz) after Suramin
	3158	0		217	480		8082.62	0		832.612	457.14		7131.15	2790.34		250.724	131.099		10000	196.546		10000	5760.75		274.472	140.763		312.366	331.807		512.036	0		377.945	154.497		142.965	182.349		0	0
	2124	653		900	624		5527.13			571.618	1166.96		1518.44	4444.46		2978.78	198.763		10000	543.891		10000	600.388		251.839	1069.17		436.166	594.795		319.705			336.319	236.16		434.526	686.489
	3445	2641		923	537		279.672			10000	758.042		4640.07	7571.26		402.77	2801.01		425.336	164.353		10000	955.99		244.2	229.333		5713.3	462.072		442.363			793.499	2538.17		301.519	100.113
	6965	820		291	252		10000			862.258	325.977		4139.74	1088.65		10000	651.267		10000	831.933		126.445	4614.55		244.2			723.536	990.505		251.745			575.613	249.403		473.248	248.495
	8179	979		0	0		330.422			569.187	275.827		3006.29	1622.41		10000	315.766		10000	396.481		212.997	1951.67		220.729			291.302	1172.38		416.203			376.753	178.776		632.035	94.7498
	2985	1939					314.222			920.182	515.006		5267.31	1703.45		342.747			4235.91	389.704		10000	114.123		190.71			341.958	191.711		283.488			575.613	271.474		233.156	162.684
							5574.15			773.453	1267.26		2538.54	1210.2		10000			10000	5901.47		221.796	380.411		208.582			328.636			653.175			309.458	150.083		476.931	345.032
Average	4476	1172		466.2	378.6		3682.95			10000	387.701		2334.6	697.585		10000			10000	633.692		264.683	215.015		165.626			407.582			509.497			1656.28	150.083		288.897	219.891
SEM	1007.47	389.378		171.597	103.048		6314.96			1401.55	555.512		3349.18			10000			10000	1267.38		1509.55	215.015		152.941			154.671			709.164			2173.07	902.706		99.9342	228.83
T-test (paired, 2-tailed, equal variance)	0.0323893			0.483174			183.441			2526.65	457.14		524.88			10000			10000	206.712		158.714	568.963					2173.61			943.738			538.644			133.097
							216.235			10000	237.25					10000			498.77	288.042		545.989	5011.5					941.25			272.665			538.644			148.739
							1594.6			761.649	459.069					10000			10000	2965.14		86.1549	1075.07					941.25			346.107			1766.94			110.178
							300.35			306.245	216.032					10000			10000	271.098		318.718	820.365					278.939			541.824			2295.94			313.729
							954.784			362.278	873.773					10000			10000	413.425		10000	471.379					804.202			150.451			319.766			366.825
							6945.73			563.729	879.56					10000			10000	891.235		554.358	421.76					491.32			263.999			2687.81			587.288
							231.359			355.643	648.097					10000			10000	308.374		99.8166	6136.2					61.9127			290.341			2967.01			284.732
										358.305	1199.75					10000			10000			10000	540.845								319.221			981.478			194.684
										10000	1076.3					1832.57			10000			540.002	491.227								264.866			1639.28			85.4715
										1240.82						288.883			242.718			526.506	6500.07								1562.13			390.084			278.421
										887.623						177.956						299.632									2728.69			1306.85			322.382
										1117.02						10000						10000									1886.08			745.516			210.72
										912.563												750.568												357.971			272.575
										1005.05												4961.88												223.845
										311.106												657.615												95.5015
										824.356												3165.17												661.955
										460.014												1062.84												394.101
										277.679												4961.88												547.98
										1210.46												4697.25												2018.22
										3708.1												240.288												479.317
										601.476												234.763												725.123
																						235.293												336.782
																						10000												356.139
																						1074.99
																						812.442
																						137.692
																						367.494
																						231.67
																						406.56
																						163.097
																						10000
																						144.242
																						377.054
																						1184.88
																						10000
						Average	3158.29	0		2124.05	653.133		3445.02	2641.05		6965.45	819.581		8179.09	979.342		2984.84	1939.23		217.033	479.754		900.125	623.879		650.833	0		923.421	536.817		290.548	252.07		0	0
