# Supplementary material for: The Cl--channel TMEM16A is involved in the generation of cochlear Ca2+ waves and promotes the refinement of auditory brainstem networks in mice
Source: eLife. 2022 Feb 7;11:e72251. doi: 10.7554/eLife.72251 (PMC8871368; doi:10.7554/eLife.72251)
Supplement: Figure 1—source data 1. [file elife-72251-fig1-data1.xlsx]

## Sheet: Explanation
This workbook contains Ca2+ and DIC imaging data from p5-p7 TMEM16A KO mice and WT mice as shown in the MS "The Cl--channel TMEM16A controls the generation of cochlear Ca2+ waves and promotes the refinement of auditory brainstem networks" by A. Maul et al.
Data were acquired by
Worksheet "Ca2+ Imaging" contains data shown in Figure 1. Column B and C contain the average event area from all Ca2+ events observed in wildtype and TMEM16A mice, respectively. Each line in column B represents one cochlea from one mouse examined (n=14 WT mice and n=16 cKO mice). Column E and F contain the average frequency from all events observed in the same wildtype and TMEM16A mice as shown i…
Worksheet "Volume Changes" contains data shown in Figure 1. Column B and C contain the average event area from all events observed in wildtype and TMEM16A mice, respectively. Each line in column B represents one cochlea from one mouse examined (n=7 WT mice and n=9 cKO mice). Column E and F contain the average frequency from all Ca2+ events observed in the same wildtype and TMEM16A mice as shown i…
*If an event has the area of 10.000µm, this indicates a Ca2+ event or a volume change that traveled as wave over the whole visul field of Köllliker's organ.

## Sheet: Ca2+ Imaging
	WT Area (µm2*10^3)	cKO Area (µm2*10^3)		WT Frequency (Hz)	cKO Frequency (Hz)			WT1 Area (µm2*10^3)	WT2 Area (µm2*10^3)	WT3 Area (µm2*10^3)	WT4 Area (µm2*10^3)	WT5 Area (µm2*10^3)	WT6 Area (µm2*10^3)	WT7 Area (µm2*10^3)	WT8 Area (µm2*10^3)	WT9 Area (µm2*10^3)	WT10 Area (µm2*10^3)	WT11 Area (µm2*10^3)	WT12 Area (µm2*10^3)	WT13 Area (µm2*10^3)	WT14 Area (µm2*10^3)		cKO1 Area (µm2*10^3)	cKO2 Area (µm2*10^3)	cKO3 Area (µm2*10^3)	cKO4 Area (µm2*10^3)	cKO5 Area (µm2*10^3)	cKO6 Area (µm2*10^3)	cKO7 Area (µm2*10^3)	cKO8 Area (µm2*10^3)	cKO9 Area (µm2*10^3)	cKO10 Area (µm2*10^3)	cKO11 Area (µm2*10^3)	cKO12 Area (µm2*10^3)	cKO13 Area (µm2*10^3)	cKO14 Area (µm2*10^3)	cKO15 Area (µm2*10^3)	cKO16 Area (µm2*10^3)
	1165	437		0.034	0.008			4855.03	8883.42	10000	1229.74	547.19	805.46	552.339	10000	8082.62	832.612	7131.15	250.724	10000	10000		395.609	188.844	5000	423.684	370.405	224.015	231.964	321.112	1426.32	274.472	312.366	512.036	0	377.945	142.965	0
	3751	421		0.0436	0.0116			796.477	306.964	10000	221.541	263.736	779.978	461.47	5000	5527.13	571.618	1518.44	2978.78	10000	10000		377.026	934.243	5000	534.998	489.824	194.258	237.177	231.654	778.616	251.839	436.166	319.705		336.319	434.526
	10000	3658		0.012	0.018			931.629	584.683	10000	500.344	436.721	592.512	2172.23	10000	279.672	10000	4640.07	402.77	425.336	10000		271.889	344.729	8536.06	285.447	2178.7	232.062	149.604	181.255	340.774	244.2	5713.3	442.363		793.499	301.519
	1308	357		0.0608	0.02			1095.25	10000	10000	4482.6	1622.97	264.447	6027.91	310.213	10000	862.258	4139.74	10000	10000	126.445		379.227	741.48	5000	199.336		401.991	294.864	145.796	642.365	244.2	723.536	251.745		575.613	473.248
	754	1013		0.0432	0.0024			749.717	653.637	10000	256.274	1410.1	2077.45	1035.19	5000	330.422	569.187	3006.29	10000	10000	212.997		276.046	457.323	5000	392.37		288.206	263.761	208.255	214.32	220.729	291.302	416.203		376.753	632.035
	1000	258		0.0456	0.0128			5584.8	507.169	10000	671.037	725.553	543.329	5235.93	10000	314.222	920.182	5267.31	342.747	4235.91	10000		753.075	592.364	2500	199.336		194.258	233.007	524.506	762.289	190.71	341.958	283.488		575.613	233.156
	2007	446		0.0464	0.0168			950.715	10000	10000	225.609	2059.69	2851.54	1953.08	10000	5574.15	773.453	2538.54	10000	10000	221.796		655.517	70.7274	2500	1501.7		246.285	325.097		389.159	208.582	328.636	653.175		309.458	476.931
	6899	269		0.0108	0.0044			586.692	286.278	10000	2363.57	863.583	284.049	8678.25	10000	3682.95	10000	2334.6	10000	10000	264.683		389.741	185.103	5000	185.206		164.876	420.489		199.181	165.626	407.582	509.497		1656.28	288.897
	3158	668		0.014	0.02			594.246	209.24	10000	1098.94	217.576	288.148	979.955	5000	6314.96	1401.55	3349.18	10000	10000	1509.55			164.08	2500	422.347		283.153	268.453		390.347	152.941	154.671	709.164		2173.07	99.9342
	2124	217		0.0232	0.0056			406.37	10000	10000	283.81	436.721	590.908	1308.69	10000	183.441	2526.65	524.88	10000	10000	158.714			785.484	2500	302.822		257.888	271.233		352.351		2173.61	943.738		538.644	133.097
	3445	900		0.0072	0.0156			447.126	482.678	10000	347.8	436.721	1183.42	1518.63	582.501	216.235	10000		10000	498.77	545.989			266.519	5000	141.291		179.099	1729.05		642.365		941.25	272.665		538.644	148.739
	6965	651		0.012	0.0168			717.509	420.144	10000	645.535	198.53	654.347	1410.54		1594.6	761.649		10000	10000	86.1549			250.129	631.091	158.667		234.121	252.641		700.249		941.25	346.107		1766.94	110.178
	8179	0		0.0128	0			405.575	601.327	10000	2938.23	1622.97	233.263	975.204		300.35	306.245		10000	10000	318.718			293.421	5000	265.017		252.835	1240.79		1047.26		278.939	541.824		2295.94	313.729
	2985	923		0.0292	0.0284			773.773	325.986	10000	220.602	743.031	913.092	1870.82		954.784	362.278		10000	10000	10000			495.092	4451.88	535.762		299.248	137.615		1782.53		804.202	150.451		319.766	366.825
		291			0.0156			660.053	10000	10000	2363.57	736.981	442.112	1236.53		6945.73	563.729		10000	10000	554.358			653.828	245.219	140.719		190.89	264.109		181.37		491.32	263.999		2687.81	587.288
		0			0			1340.98	360.701	10000	459.979	891.593	558.708	885.523		231.359	355.643		10000	10000	99.8166			314.621	828.109	324.97		557.884	423.791		676.205		61.9127	290.341		2967.01	284.732
Average	3838.57	656.812		0.0282	0.01225			468.598	1849.39	10000	2938.23	351.349	50.6085	1396.59			358.305		10000	10000	10000				2500	141.291		186.772	361.065		822.845			319.221		981.478	194.684
SEM	794.271	214.106		0.00502259	0.00204087			719.895	1552.65		459.979	913.552	506.798	781.292			10000		1832.57	10000	540.002					274.564			1157.91					264.866		1639.28	85.4715
T-test (unpaired, 2-tailed, equal variance)	0.000318533			0.00273635				1732.44	10000		209.65	438.514	789.422	1008.46			1240.82		288.883	242.718	526.506					717.341			538.817					1562.13		390.084	278.421
								217.897	420.857		362.507	315.721	1066.88	5800.45			887.623		177.956		299.632					409.363			283.396					2728.69		1306.85	322.382
								10000	399.458		2363.57	239.76	639.2	929.176			1117.02		10000		10000					320.77			120.934					1886.08		745.516	210.72
								217.897	10000		459.979	833.333	236.648	1918.63			912.563				750.568					318.861			171.497							357.971	272.575
								340.961	608.698		209.65	833.333	215.265	2747.14			1005.05				4961.88					125.444			182.965							223.845
								259.448	608.698		645.535	1078.47	661.119	6385.45			311.106				657.615					276.473			1143.84							95.5015
								1514.94	767.292		3171.82	151.698	1823.69	1198.81			824.356				3165.17					266.544										661.955
								822.482	10000		605.482	321.099	453.695	809.206			460.014				1062.84					430.175										394.101
								412.334	670.519		2363.57	838.263	780.156	875.427			277.679				4961.88															547.98
								279.926	2456.9		318.074	891.145	640.626	1198.81			1210.46				4697.25															2018.22
								287.083	10000		3171.82	1959.31	391.503	1216.04			3708.1				240.288															479.317
								373.367	673.61		2363.57	838.263	901.331	786.637			601.476				234.763															725.123
								723.474	8883.42		3171.82	367.706	362.101	2200.45							235.293															336.782
								1354.1	383.052		318.074	369.051	765.365	1131.11							10000															356.139
								1151.71	5551.99		2363.57	708.524	472.228	737.936							1074.99
								983.519	360.939		459.196	1009.01	721.706	601.633							812.442
								1124.67	778.467		212.936	1183.79	704.956	558.575							137.692
								258.057	841.715		297.891	1810.52	817.934	1036.38							367.494
								191.654	10000		400.056	1003.18	701.035	782.48							231.67
								786.696	545.212		4848.08	1645.16	757.703	599.852							406.56
								1252.31	600.376		372.833	668.19	4405.97	7252.26							163.097
								1063.64	10000		152.45	1499.06	1342.37								10000
								1252.31	1332.24		325.427	348.436	2639.49								144.242
								1063.64	3513.8		4848.08	332.975	609.085								377.054
								332.015	4451.34		727.361	452.855	2138.57								1184.88
									1656.09		672.602	387.201	2517.6								10000
									10000		372.833	574.527	597.68
									10000		4848.08	489.155	1219.06
											517.241	413.642	1398.86
											3135.83	677.602	983.481
											210.12	736.981	326.817
											4848.08	199.202	418.946
											350.523	369.499	378.673
											319.169		1354.49
											4848.08		750.04
											203.861		371.723
											198.072		927.17
											3135.83		555.268
											198.072		897.411
											389.417		5738.72
											210.12		1170.06
											2241.54		1433.79
											3240.03		179.981
											2241.54		1846.14
											198.072		1132.28
											672.602		1169.7
											174.761
											808.092
											303.054
											348.739
											4847.93
											2241.54
											152.45
											4848.08
											198.072
											303.054
											2241.54
											319.169
											303.054
											4848.08
											174.761
											501.126
											448.557
											636.304
											316.979
											2241.54
											313.537
											198.072
											654.609
											471.556
											4848.08
											471.556
											1512.92
											303.054
											1512.92
											198.072
											152.388
											303.054
											198.072
							Average Area	1164.67	3750.63	10000	1308.22	754.191	1000.41	2006.54	6899.34	3158.29	2124.05	3445.02	6965.45	8179.09	2984.84		437.266	421.124	3658.37	357.481	1012.98	258.108	446.002	268.763	667.562	217.033	900.125	650.833	0	923.421	290.548	0
							Frequency	43	46	16	96	50	64	39	11	16	30	10	21	19	44		8	16	17	26	3	17	24	6	17	9	16	21	0	32	22	0
							Frequency (µm2*10^3)	0.034	0.0436	0.012	0.0608	0.0432	0.0456	0.0464	0.0108	0.014	0.0232	0.0072	0.012	0.0128	0.0292		0.008	0.0116	0.018	0.02	0.0024	0.0128	0.0168	0.0044	0.02	0.0056	0.0156	0.0168	0	0.0284	0.0156	0	0.01225	0.00204087

## Sheet: Volume Changes
	WT Area (µm2*10^3)	cKO Area (µm2*10^3)		WT Frequency (Hz)	cKO Frequency (Hz)			WT1 Area (µm2*10^3)	WT2 Area (µm2*10^3)	WT3 Area (µm2*10^3)	WT4 Area (µm2*10^3)	WT5 Area (µm2*10^3)	WT6 Area (µm2*10^3)	WT7 Area (µm2*10^3)		cKO1 Area (µm2*10^3)	cKO2 Area (µm2*10^3)	cKO3 Area (µm2*10^3)	cKO4 Area (µm2*10^3)	cKO5 Area (µm2*10^3)	cKO6 Area (µm2*10^3)	cKO7 Area (µm2*10^3)	cKO8 Area (µm2*10^3)	cKO9 Area (µm2*10^3)
	10000	0		0.0407725	0			10000	6813.97	661.191	3188.35	126.947	10000	10000		0	0	0	196.507	103.093	0	0	0	0
	6117	0		0.0273247	0			10000	6813.97	336.756	10000	2273.51	10000	10000					181.951	103.093
	1942	0		0.0287554	0			10000	10000	3359.34	10000	233.699	10000	10000					196.507
	7158	260		0.00400572	0.00219853			10000	10000	4973.31	715.538	10000	10000	10000					196.507
	4817	103		0.0064	0.000466356			10000	10000	1601.64	10000	112.522	10000	10000					196.507
	9111	0		0.0056	0			10000	10000	2915.81	3363.73	10000	4664.18	10000					458.515
	10000	0		0.00671343	0			10000	10000	919.918	10000	10000		10000					262.009
		0			0			10000	10000	472.279	10000	112.522		10000					196.507
		0			0			10000	2902.35	1577		10000		10000					458.515
								10000	6813.97	1642.71		126.947		10000
Average	7020.71	40.3333		0.0170817	0.000296099			10000	10000	2447.64		10000		10000
SEM	1127.95	29.7134		0.00561166	0.000243298			10000	10000	1375.77				10000
T-test (unpaired, 2-tailed, equal variance)	5.55651e-06			0.00417884				10000	2138.57	2447.64				10000
								10000	6813.97	3357.7
								10000	6813.97	977.413
								10000	6813.97	969.199
								10000	10000	373.717
								10000	10000	410.678
								10000	10000	4476.39
								10000	589.198	616.016
								10000	1112.93	2061.6
								10000	1467.54	418.891
								10000	643.753	1626.28
								10000	1631.21	361.396
								10000	6813.97	2316.22
								10000	1112.93	1646.82
								10000	10000	2057.49
								10000	10000	2418.89
								10000	2596.84	2123.2
								10000	201.855	1819.3
								10000	6813.97	6365.5
								10000	6813.97	751.54
								10000	6813.97	5708.42
								10000	436.443	492.813
								10000	1112.93	2053.39
								10000		435.318
								10000		2258.73
								10000		1342.92
								10000		4423
								10000		1248.46
								10000		800.821
								10000		4423
								10000		369.61
								10000		1133.47
								10000		4061.6
								10000		3535.93
								10000		303.901
								10000		850.103
								10000		1852.16
								10000
								10000
								10000
								10000
								10000
								10000
							Average Area	10000	6116.75	1942.3	7158.45	4816.92	9110.7	10000		0	0	0	260.391	103.093	0	0	0	0
							Frequency	55	35	49	8	11	6	13		0	0	0	9	2	0	0	0	0
							Frequency (µm2*10^3)
