# Supplementary material for: The Cl--channel TMEM16A is involved in the generation of cochlear Ca2+ waves and promotes the refinement of auditory brainstem networks in mice
Source: eLife. 2022 Feb 7;11:e72251. doi: 10.7554/eLife.72251 (PMC8871368; doi:10.7554/eLife.72251)
Supplement: Figure 2—source data 1. [file elife-72251-fig2-data1.xlsx]

## Sheet: mean & SD (per cell)
category (time in ms)		Bar Number		WT1	WT2	WT3	WT4	WT5	WT6	WT7	WT8	WT9	WT10	WT11	WT12	WT13	WT14		cell name	No ISIs Balken 1	No ISIs Balken 2	No ISIs Balken 3	No ISIs Balken 4	No ISIs Balken 5	No ISIs Balken 6	No ISIs Balken 7	No ISIs Balken 8	No ISIs Balken 9	No ISIs Balken 10	No ISIs Balken 11	No ISIs Balken 12	No ISIs Balken 13	No ISI Balken 14	No ISI Vbalken 15	No ISIs Balken 16	No ISIs Balken 17	No ISIs Balken 18	No ISIs Balken 19	No ISIs Balken 20	Total No ISIs per cell		cKO1	cKO2	cKO3	cKO4	cKO5	cKO6	cKO7	cKO8
0 - 1.0	10^0	1		0.0026	0.0028	0.0029	0.0014	0.0037	0.0033	0.0027	0.0027	0.0028	0.0023	0.0023	0.0037	0.0032	0.0034		WT1	0	0	17	5	23	15	3	0	3	6	4	3	0	1	1	0	0	2	0	0	83		0.0592	0.0033	0.0036	0.0023	0.0031	0.0029	0.0032	0.0035
1.0 - 1.58		2		0.0027	0.0032	0.0031	0.0031	0.0039	0.0035	0.0028	0.0028	0.0029	0.003	0.0025	0.0042	0.0033	0.0037		WT2	0	0	29	14	3	4	0	3	0	3	10	5	3	3	4	2	0	0	0	0	83		0.0597	0.0038	0.0044	0.0023	0.004	0.003	0.0032	0.0037
1.58 - 3.98		3		0.0028	0.0032	0.0037	0.0031	0.004	0.004	0.0028	0.0029	0.0029	0.0031	0.0028	0.0052	0.0033	0.0039		WT3	0	0	4	9	8	8	4	6	6	7	13	7	3	0	4	0	0	2	2	0	83		0.0676	0.0038	0.0045	0.0023	0.0041	0.0035	0.0032	0.0037
3.98 - 6.31		4		0.0028	0.0032	0.0038	0.0033	0.0042	0.0056	0.0028	0.003	0.0035	0.0031	0.0029	0.0053	0.0035	0.0043		WT4	0	1	8	22	8	3	3	2	3	5	12	5	3	1	1	1	3	0	0	2	83		0.0726	0.004	0.0048	0.0023	0.0045	0.0035	0.0033	0.0044
6.31 - 10	10^1	5		0.003	0.0032	0.0043	0.0034	0.0046	0.006	0.0029	0.0031	0.0035	0.0031	0.0029	0.0055	0.0037	0.0043		WT5	0	0	2	9	6	3	7	12	10	5	13	2	4	3	0	2	2	2	1	0	83		0.0745	0.004	0.0048	0.0024	0.005	0.0035	0.0034	0.0048
10 - 15.85		6		0.0031	0.0032	0.0046	0.0035	0.0055	0.0073	0.0029	0.0032	0.0037	0.0032	0.003	0.0056	0.0039	0.0044		WT6	0	0	2	3	1	8	4	11	8	8	10	9	7	7	3	0	2	0	0	0	83		0.0775	0.0041	0.0048	0.0024	0.0051	0.0037	0.0035	0.0052
15.85 - 25.12		7		0.0031	0.0032	0.0046	0.0035	0.0058	0.0108	0.0031	0.0033	0.0038	0.0032	0.003	0.0058	0.004	0.0045		WT7	0	0	15	19	3	1	6	2	2	8	7	6	4	6	4	0	0	0	0	0	83		0.0814	0.0042	0.0049	0.0024	0.0066	0.0041	0.0035	0.0053
25.12 - 39.81		8		0.0031	0.0033	0.0047	0.0037	0.0058	0.0109	0.0031	0.0034	0.0038	0.0036	0.0031	0.006	0.004	0.0047		WT8	0	0	16	13	5	4	6	9	5	7	9	4	3	2	0	0	0	0	0	0	83		0.0844	0.0045	0.005	0.0025	0.0073	0.0042	0.0036	0.0056
39.81 - 63.1		9		0.0032	0.0033	0.0048	0.0037	0.0062	0.0112	0.0031	0.0035	0.0038	0.0037	0.0032	0.0065	0.004	0.0047		WT9	0	0	9	14	4	4	10	6	6	8	6	6	4	2	3	1	0	0	0	0	83		0.1029	0.0045	0.0055	0.0025	0.0077	0.0043	0.0037	0.0056
63.1 - 100	10^2	10		0.0032	0.0034	0.0054	0.004	0.0062	0.0116	0.0032	0.0035	0.0042	0.0038	0.0033	0.0069	0.0042	0.005		WT10	0	0	14	8	3	9	8	9	2	10	8	4	2	2	2	1	0	1	0	0	83		0.1062	0.0049	0.0058	0.0026	0.0081	0.0045	0.0038	0.0056
100 - 158.5		11		0.0035	0.0035	0.0055	0.0041	0.0062	0.0116	0.0034	0.0036	0.0044	0.0038	0.0033	0.0071	0.0043	0.0052		WT11	0	0	14	12	7	8	9	7	9	5	7	4	1	0	0	0	0	0	0	0	83		0.1123	0.0055	0.0059	0.0026	0.0093	0.0045	0.0039	0.006
158.5 - 251.2		12		0.0036	0.0035	0.0057	0.0042	0.0064	0.012	0.0036	0.0037	0.0046	0.0039	0.0034	0.0072	0.0043	0.0052		WT12	0	0	1	7	13	6	6	11	11	8	3	8	4	3	0	2	0	0	0	0	83		0.1249	0.0057	0.0061	0.0026	0.0098	0.0046	0.0039	0.0061
251.2 - 398.1		13		0.0037	0.0035	0.0063	0.0042	0.0068	0.0132	0.0037	0.0038	0.0048	0.0039	0.0038	0.0072	0.0044	0.0054		WT13	0	0	6	19	10	1	4	2	6	6	6	7	5	5	2	2	2	0	0	0	83		0.1277	0.0058	0.0062	0.0026	0.0114	0.0046	0.0039	0.0062
398.1 - 631		14		0.0038	0.0035	0.0064	0.0043	0.007	0.0158	0.0037	0.0038	0.0048	0.0039	0.0039	0.0079	0.0047	0.0055		WT14	0	0	3	17	12	6	3	4	8	6	13	4	2	2	2	0	0	1	0	0	83		0.1301	0.0058	0.0063	0.0026	0.0122	0.0047	0.004	0.0062
631 - 1000	10^3	15		0.0039	0.0035	0.007	0.0044	0.0076	0.0178	0.0038	0.0039	0.0049	0.004	0.004	0.0079	0.0047	0.0058																									0.1372	0.0068	0.0064	0.0027	0.0138	0.005	0.0041	0.0062
1000 - 1585		16		0.0039	0.0036	0.0072	0.0045	0.0091	0.0208	0.004	0.0039	0.0049	0.0041	0.0044	0.0085	0.0048	0.006		Average No ISIs	0	0.0714286	10	12.2143	7.57143	5.71429	5.21429	6	5.64286	6.57143	8.64286	5.28571	3.21429	2.64286	1.85714	0.785714	0.642857	0.571429	0.214286	0.142857			0.1461	0.007	0.0067	0.0028	0.0144	0.0051	0.0041	0.0063
1585 - 2512		17		0.0039	0.0036	0.0076	0.0045	0.0091	0.021	0.004	0.004	0.0052	0.0041	0.0046	0.0091	0.0048	0.006		SD No ISIs	0	0.267261	7.93241	5.6864	5.69364	3.72989	2.72251	3.94189	3.31911	1.78516	3.3422	1.9779	1.71772	2.09788	1.56191	0.892582	1.08182	0.851631	0.578934	0.534522			0.1816	0.0078	0.0079	0.0028	0.0152	0.0052	0.0041	0.0072
2512 - 3981		18		0.0041	0.0036	0.0088	0.0046	0.0118	0.0229	0.0041	0.0042	0.0052	0.0041	0.0046	0.0091	0.0054	0.0061		s.e.m. No ISIs	0	0.0714602	2.12096	1.52043	1.52236	0.997297	0.727945	1.05398	0.887462	0.477317	0.893638	0.52885	0.459282	0.56093	0.417623	0.238658	0.289256	0.227709	0.154795	0.14292			0.1836	0.0082	0.0085	0.0028	0.0157	0.0057	0.0041	0.0072
3981 - 6310		19		0.0045	0.0036	0.009	0.0046	0.0145	0.0256	0.0041	0.0043	0.0057	0.0045	0.0048	0.0094	0.0054	0.0061		Average No ISIs (%) WT1	0	0	20.4819	6.0241	27.7108	18.0723	3.61446	0	3.61446	7.22892	4.81928	3.61446	0	1.20482	1.20482	0	0	2.40964	0	0	100		0.1876	0.0084	0.0185	0.0029	0.0184	0.0064	0.0041	0.0094
6310 - 10000	10^4	20		0.0046	0.0037	0.0092	0.0047	0.0158	0.0265	0.0042	0.0044	0.0058	0.005	0.0049	0.0099	0.0055	0.0063		Average No ISIs (%) WT2	0	0	34.9398	16.8675	3.61446	4.81928	0	3.61446	0	3.61446	12.0482	6.0241	3.61446	3.61446	4.81928	2.40964	0	0	0	0	100		0.1885	0.0091	0.0186	0.0029	0.0219	0.0067	0.0042	0.0117
				0.0046	0.0037	0.01	0.0047	0.0161	0.027	0.0044	0.0046	0.006	0.0053	0.005	0.01	0.006	0.0064		Average No ISIs (%) WT3	0	0	4.81928	10.8434	9.63855	9.63855	4.81928	7.22892	7.22892	8.43373	15.6627	8.43373	3.61446	0	4.81928	0	0	2.40964	2.40964	0	100		0.1926	0.0098	0.0373	0.003	0.0223	0.0076	0.0042	0.0133
				0.0046	0.0037	0.0107	0.0048	0.0179	0.0273	0.0045	0.0048	0.006	0.0054	0.0052	0.011	0.006	0.0065		Average No ISIs (%) WT4	0	1.20482	9.63855	26.506	9.63855	3.61446	3.61446	2.40964	3.61446	6.0241	14.4578	6.0241	3.61446	1.20482	1.20482	1.20482	3.61446	0	0	2.40964	100		0.1982	0.0118	0.0543	0.003	0.0245	0.0079	0.0043	0.0162
				0.0066	0.0038	0.0111	0.005	0.019	0.0275	0.0046	0.0049	0.0062	0.0078	0.0053	0.0119	0.006	0.0066		Average No ISIs (%) WT5	0	0	2.40964	10.8434	7.22892	3.61446	8.43373	14.4578	12.0482	6.0241	15.6627	2.40964	4.81928	3.61446	0	2.40964	2.40964	2.40964	1.20482	0	100		0.2288	0.0118	0.0621	0.003	0.0312	0.0087	0.0043	0.0197
				0.0073	0.0038	0.0113	0.0051	0.022	0.029	0.0047	0.0051	0.0068	0.0088	0.0056	0.0133	0.006	0.0067		Average No ISIs (%) WT6	0	0	2.40964	3.61446	1.20482	9.63855	4.81928	13.253	9.63855	9.63855	12.0482	10.8434	8.43373	8.43373	3.61446	0	2.40964	0	0	0	100		0.2293	0.0141	0.0671	0.0032	0.0324	0.0127	0.0044	0.0199
				0.0083	0.0039	0.013	0.0053	0.0223	0.0298	0.0047	0.0052	0.0077	0.0094	0.0057	0.0138	0.0063	0.0067		Average No ISIs (%) WT7	0	0	18.0723	22.8916	3.61446	1.20482	7.22892	2.40964	2.40964	9.63855	8.43373	7.22892	4.81928	7.22892	4.81928	0	0	0	0	0	100		0.2343	0.0164	0.0698	0.0032	0.0359	0.0591	0.0044	0.0221
				0.0084	0.0039	0.0133	0.0053	0.0238	0.0308	0.0047	0.0052	0.0079	0.0101	0.0063	0.0148	0.0067	0.007		Average No ISIs (%) WT8	0	0	19.2771	15.6627	6.0241	4.81928	7.22892	10.8434	6.0241	8.43373	10.8434	4.81928	3.61446	2.40964	0	0	0	0	0	0	100		0.2436	0.0177	0.0703	0.0033	0.0386	0.0599	0.0045	0.0221
				0.0087	0.0039	0.0136	0.0053	0.0243	0.0318	0.0048	0.0054	0.0089	0.0113	0.0064	0.0149	0.0072	0.0073		Average No ISIs (%) WT9	0	0	10.8434	16.8675	4.81928	4.81928	12.0482	7.22892	7.22892	9.63855	7.22892	7.22892	4.81928	2.40964	3.61446	1.20482	0	0	0	0	100		0.2437	0.0193	0.0709	0.0035	0.0414	0.0599	0.0048	0.0223
				0.0088	0.0039	0.0146	0.0055	0.0264	0.0322	0.0049	0.0055	0.0114	0.0115	0.0069	0.0172	0.0075	0.0073		Average No ISIs (%) WT10	0	0	16.8675	9.63855	3.61446	10.8434	9.63855	10.8434	2.40964	12.0482	9.63855	4.81928	2.40964	2.40964	2.40964	1.20482	0	1.20482	0	0	100		0.2522	0.0201	0.0722	0.0035	0.0419	0.0674	0.0049	0.0235
				0.0089	0.0039	0.0151	0.0056	0.0272	0.0331	0.005	0.006	0.0131	0.0115	0.0075	0.0198	0.0078	0.0076		Average No ISIs (%) WT11	0	0	16.8675	14.4578	8.43373	9.63855	10.8434	8.43373	10.8434	6.0241	8.43373	4.81928	1.20482	0	0	0	0	0	0	0	100		0.2609	0.0257	0.0727	0.0035	0.0424	0.0692	0.005	0.0297
				0.0089	0.004	0.0166	0.0056	0.0278	0.0423	0.005	0.0073	0.0134	0.0122	0.0078	0.0221	0.0079	0.0087		Average No ISIs (%) WT12	0	0	1.20482	8.43373	15.6627	7.22892	7.22892	13.253	13.253	9.63855	3.61446	9.63855	4.81928	3.61446	0	2.40964	0	0	0	0	100		0.2613	0.0272	0.0736	0.0035	0.0461	0.0694	0.0052	0.0368
				0.0089	0.004	0.0187	0.0057	0.0285	0.0459	0.0056	0.0074	0.0155	0.0122	0.0079	0.0222	0.0082	0.0093		Average No ISIs (%) WT13	0	0	7.22892	22.8916	12.0482	1.20482	4.81928	2.40964	7.22892	7.22892	7.22892	8.43373	6.0241	6.0241	2.40964	2.40964	2.40964	0	0	0	100		0.2633	0.0272	0.0765	0.0036	0.0492	0.0712	0.0052	0.0386
				0.009	0.004	0.0209	0.0066	0.0309	0.0487	0.0058	0.008	0.0167	0.0124	0.008	0.0244	0.0083	0.0097		Average No ISIs (%) WT14	0	0	3.61446	20.4819	14.4578	7.22892	3.61446	4.81928	9.63855	7.22892	15.6627	4.81928	2.40964	2.40964	2.40964	0	0	1.20482	0	0	100		0.2804	0.0294	0.0778	0.0036	0.0498	0.0835	0.0054	0.0407
				0.0091	0.0042	0.0249	0.0067	0.0312	0.0497	0.0059	0.0087	0.0178	0.0156	0.01	0.0246	0.0088	0.0103		Average No ISIs (%) all WT cells	0	0.0860585	12.0482	14.716	9.1222	6.88468	6.28227	7.22892	6.79862	7.91738	10.4131	6.36833	3.87263	3.18417	2.23752	0.946644	0.774527	0.688468	0.258176	0.172117	100		0.2811	0.0305	0.0845	0.0038	0.0498	0.0841	0.0061	0.0451
				0.0092	0.0042	0.0278	0.0069	0.0347	0.0539	0.006	0.0092	0.0184	0.0158	0.0109	0.0305	0.0091	0.011		SD No ISIs (%) all WT cells	0	0.322001	9.55712	6.85109	6.85981	4.49384	3.28014	4.74926	3.99893	2.1508	4.02675	2.38301	2.06954	2.52757	1.88182	1.0754	1.30339	1.02606	0.697511	0.644003			0.2846	0.0306	0.0911	0.0042	0.0519	0.0865	0.0078	0.0466
				0.0092	0.0044	0.0328	0.0074	0.0375	0.0582	0.0064	0.0115	0.0191	0.0164	0.0129	0.0319	0.0096	0.0117		s.e.m. No ISIs (%) all WT cells	0	0.0860967	2.55538	1.83184	1.83417	1.20156	0.877042	1.26986	1.06923	0.57508	1.07667	0.637169	0.553352	0.67582	0.50316	0.28754	0.348501	0.274348	0.1865	0.172193			0.2948	0.0373	0.0971	0.0044	0.0534	0.091	0.0084	0.0506
				0.0093	0.0047	0.0333	0.0078	0.0375	0.0607	0.0075	0.0124	0.0191	0.0164	0.0132	0.0323	0.0114	0.0122																									0.3052	0.0373	0.1022	0.0045	0.054	0.1022	0.0088	0.0583
				0.0094	0.0049	0.0356	0.0083	0.0376	0.0614	0.0086	0.0129	0.0204	0.017	0.0132	0.0331	0.0159	0.0141																									0.3053	0.0394	0.1041	0.0048	0.0557	0.103	0.0089	0.0583
				0.0095	0.005	0.0387	0.0084	0.0377	0.0635	0.0148	0.0137	0.0213	0.0175	0.0146	0.0342	0.0222	0.0149																									0.3055	0.0428	0.1047	0.0048	0.0575	0.1068	0.0092	0.0588
				0.0095	0.0056	0.0394	0.0089	0.0382	0.0726	0.0163	0.0166	0.0216	0.019	0.0149	0.0343	0.0222	0.018																									0.3186	0.0475	0.1057	0.005	0.0589	0.1155	0.0095	0.0717
				0.0095	0.0057	0.0413	0.0101	0.0399	0.0764	0.0167	0.0169	0.0217	0.0237	0.0156	0.035	0.0236	0.0208																									0.3189	0.0501	0.1127	0.0053	0.0594	0.1196	0.0102	0.0852
				0.0097	0.0058	0.0425	0.0105	0.045	0.0844	0.019	0.0172	0.0249	0.0245	0.0156	0.0366	0.0294	0.0238																									0.3222	0.0526	0.1134	0.0054	0.0613	0.1256	0.0123	0.0884
				0.0097	0.0059	0.0485	0.0107	0.0451	0.0885	0.0204	0.0174	0.0257	0.0246	0.0169	0.0372	0.0394	0.0252																									0.3542	0.0546	0.1186	0.0062	0.0631	0.1297	0.027	0.0937
				0.0098	0.0062	0.0508	0.0185	0.0452	0.0887	0.0213	0.0216	0.0267	0.0254	0.017	0.0386	0.0497	0.027																									0.36	0.0568	0.1188	0.0083	0.0642	0.13	0.0957	0.1009
				0.0098	0.0068	0.0539	0.0217	0.0465	0.097	0.0247	0.0226	0.0275	0.0258	0.0174	0.0389	0.0529	0.0301																									0.3667	0.0572	0.1217	0.0085	0.0659	0.1343	0.1044	0.1049
				0.0099	0.0069	0.0552	0.0219	0.0504	0.0985	0.0259	0.0328	0.0301	0.0295	0.0187	0.0428	0.0585	0.0387																									0.371	0.0646	0.1256	0.0099	0.068	0.1345	0.1125	0.1098
				0.0103	0.0072	0.0672	0.026	0.0509	0.1005	0.0365	0.0337	0.0308	0.0303	0.0204	0.0438	0.062	0.0416																									0.4133	0.0685	0.129	0.0102	0.0707	0.1423	0.1202	0.1098
				0.0104	0.0103	0.0702	0.0299	0.0527	0.1028	0.0524	0.0339	0.0324	0.0308	0.0211	0.0446	0.0625	0.0464																									0.4234	0.0704	0.13	0.0111	0.0713	0.1436	0.1213	0.1165
				0.0105	0.0116	0.071	0.0427	0.054	0.1038	0.0616	0.0346	0.0435	0.0313	0.0219	0.0479	0.0626	0.0493																									0.4236	0.0723	0.1392	0.0111	0.072	0.1442	0.1227	0.1414
				0.0105	0.0119	0.0837	0.0527	0.0598	0.1043	0.0652	0.0353	0.0452	0.034	0.0227	0.0516	0.0655	0.0501																									0.4498	0.0731	0.1404	0.0198	0.0733	0.1469	0.1312	0.1534
				0.0106	0.0156	0.0877	0.06	0.0649	0.1055	0.0799	0.0363	0.0454	0.0349	0.0228	0.0517	0.0685	0.051																									0.4515	0.0762	0.1436	0.0228	0.0754	0.1485	0.1354	0.1568
				0.0107	0.0291	0.0908	0.0635	0.0795	0.1234	0.0806	0.0365	0.0538	0.0379	0.0299	0.0524	0.0804	0.0571																									0.461	0.0912	0.1445	0.0455	0.0758	0.1506	0.1693	0.1574
				0.011	0.0329	0.0996	0.068	0.0835	0.1313	0.0841	0.037	0.0541	0.0542	0.0338	0.0535	0.0866	0.0607																									0.4808	0.0993	0.1493	0.0486	0.0785	0.1508	0.1716	0.1583
				0.011	0.0364	0.1049	0.0827	0.0836	0.1326	0.0864	0.0386	0.0598	0.0547	0.034	0.0556	0.0895	0.0614																									0.4902	0.1001	0.1501	0.0583	0.0808	0.1583	0.2037	0.1598
				0.0112	0.0788	0.1064	0.0893	0.0954	0.1352	0.0896	0.041	0.0639	0.0665	0.0343	0.0571	0.0975	0.0646																									0.5088	0.1019	0.1624	0.0615	0.0858	0.1598	0.2059	0.1654
				0.0119	0.0844	0.1159	0.0903	0.1009	0.1492	0.0942	0.0485	0.0693	0.0747	0.0361	0.0577	0.1041	0.0771																									0.5152	0.1058	0.1858	0.0851	0.0922	0.1668	0.2116	0.1866
				0.0122	0.0852	0.1168	0.104	0.102	0.1622	0.0973	0.0564	0.0802	0.0753	0.0384	0.0673	0.1059	0.0812																									0.5285	0.1077	0.1861	0.0903	0.0924	0.1712	0.2163	0.1878
				0.0126	0.1061	0.1261	0.1046	0.1037	0.1643	0.1011	0.0571	0.0848	0.0763	0.0396	0.0783	0.1061	0.0825																									0.5343	0.1098	0.233	0.0918	0.0941	0.172	0.2245	0.1906
				0.014	0.1064	0.1267	0.1069	0.1042	0.1717	0.1114	0.0572	0.0911	0.0778	0.0428	0.081	0.1166	0.084																									0.6236	0.1147	0.2454	0.1146	0.0968	0.173	0.229	0.1953
				0.0143	0.1079	0.1285	0.1116	0.1119	0.1765	0.1124	0.069	0.0919	0.079	0.0431	0.0821	0.1274	0.0869																									0.6344	0.1203	0.2455	0.1258	0.1063	0.1741	0.2416	0.1971
				0.0152	0.1173	0.1337	0.1155	0.1124	0.1795	0.1217	0.0746	0.0923	0.0822	0.0432	0.0822	0.1554	0.1001																									0.6535	0.1232	0.2625	0.1551	0.1114	0.1949	0.2645	0.2076
				0.0176	0.1222	0.1393	0.1184	0.1127	0.1834	0.1424	0.09	0.0954	0.0866	0.0443	0.0856	0.1707	0.1075																									0.7039	0.1244	0.2894	0.1631	0.1254	0.1957	0.2833	0.2164
				0.0203	0.1229	0.1398	0.1193	0.119	0.1839	0.1434	0.0907	0.1077	0.0917	0.0445	0.0939	0.1752	0.109																									0.7113	0.1249	0.2966	0.1918	0.1274	0.1995	0.2851	0.2416
				0.0247	0.1312	0.1431	0.1225	0.1229	0.2181	0.146	0.0908	0.1223	0.097	0.0446	0.098	0.2043	0.1125																									0.7269	0.1301	0.3001	0.1997	0.1297	0.2004	0.314	0.2755
				0.042	0.1329	0.1449	0.1241	0.1346	0.2295	0.1771	0.0943	0.1247	0.1008	0.045	0.1099	0.2243	0.1192																									0.7645	0.1347	0.3049	0.2007	0.1319	0.2124	0.318	0.2837
				0.0453	0.1396	0.1526	0.141	0.1371	0.2917	0.1952	0.0954	0.1251	0.1081	0.0465	0.1239	0.2357	0.1205																									0.7698	0.1385	0.3185	0.2035	0.1343	0.2294	0.3529	0.3064
				0.0539	0.1585	0.1718	0.1466	0.1448	0.2954	0.2024	0.1009	0.1266	0.1086	0.0565	0.1335	0.2373	0.1238																									0.8732	0.1463	0.3401	0.206	0.1387	0.2305	0.3782	0.3105
				0.064	0.1724	0.1731	0.1578	0.1472	0.303	0.2071	0.1017	0.1574	0.1099	0.0658	0.1697	0.2411	0.1261																									0.8972	0.1484	0.343	0.211	0.1407	0.2327	0.4518	0.3256
				0.0658	0.1896	0.1781	0.1754	0.1833	0.332	0.2129	0.1047	0.1586	0.1351	0.0898	0.1718	0.255	0.1276																									0.9264	0.1545	0.3906	0.2124	0.1408	0.235	0.5571	0.3259
				0.0684	0.2062	0.1784	0.1765	0.2035	0.3695	0.2204	0.1167	0.1698	0.1409	0.091	0.1867	0.2873	0.1328																									0.9427	0.1561	0.3979	0.2145	0.1467	0.2397	0.7786	0.344
				0.0766	0.2187	0.194	0.1773	0.2652	0.3752	0.2537	0.1202	0.1818	0.1467	0.094	0.1941	0.361	0.1448																									0.9975	0.1568	0.4052	0.2313	0.1484	0.2505	0.9526	0.3475
				0.0841	0.2248	0.1954	0.1877	0.2702	0.3797	0.2551	0.1281	0.1973	0.1512	0.099	0.1973	0.3938	0.1453																									1.0738	0.1663	0.4177	0.2449	0.1503	0.2802	0.9958	0.3759
				0.0976	0.3135	0.197	0.2216	0.276	0.4088	0.3102	0.1306	0.2268	0.1667	0.1005	0.2024	0.3943	0.1511																									1.1403	0.1699	0.4271	0.2608	0.1503	0.2815	1.2492	0.3968
				0.1062	0.3528	0.273	0.3017	0.3948	0.4317	0.3757	0.1432	0.2268	0.1842	0.1083	0.211	0.4185	0.2198																									1.1749	0.1739	0.4676	0.3298	0.1686	0.3012	1.2522	0.4464
				0.116	0.3798	0.2734	0.3284	0.4089	0.4324	0.4512	0.1544	0.2894	0.1985	0.1086	0.2211	0.4347	0.2216																									1.3552	0.1806	0.5076	0.3909	0.171	0.3166	1.3061	0.4825
				0.1507	0.4046	0.3248	0.398	0.4235	0.5089	0.4594	0.1611	0.3094	0.2235	0.1092	0.3079	0.4599	0.2292																									1.4148	0.2069	0.6443	0.3939	0.1717	0.3283	1.4202	0.5326
				0.1535	0.5231	0.7926	0.4649	0.426	0.5465	0.4766	0.1787	0.3112	0.3693	0.1212	0.3222	0.46	0.2335																									1.6324	0.2236	0.6609	0.3966	0.1742	0.331	1.866	0.6538
				0.1639	0.5279	0.876	0.915	1.0453	0.5588	0.491	0.1817	0.3628	0.3792	0.1471	0.3446	0.4665	0.2732																									1.6448	0.2254	1.0418	0.5008	0.1781	0.339	1.9567	0.7353
				0.2076	0.6902	0.9043	1.2231	1.5388	0.5738	0.591	0.2209	0.5339	0.4733	0.1476	0.3651	0.8222	0.2758																									1.7811	0.2263	1.2444	0.6423	0.2119	0.3392	2.3625	0.7918
				0.2296	0.7815	0.9672	1.5881	1.6879	0.6941	0.5954	0.287	0.5877	0.53	0.1861	0.4892	0.9623	0.4175																									1.8772	0.2895	1.431	0.7215	0.214	0.3493	4.5291	0.93
				0.5823	0.8288	2.7787	1.8877	2.3012	0.8963	0.6553	0.3245	0.7451	0.7604	0.2119	0.506	1.3588	0.4219																									1.8782	0.295	1.5315	1.3182	0.2572	0.4021	4.9848	1.293
				0.905	0.8923	3.9263	2.3341	2.8478	0.9983	0.8365	0.3486	0.8884	0.8108	0.2135	0.5679	1.5784	0.7183																									1.9974	0.3743	1.8519	1.3593	0.3176	0.4041	5.6121	1.4065
				2.7056	1.0244	4.6321	10.3874	3.3125	1.9268	0.9319	0.4654	0.9706	1.1513	0.2361	1.1227	1.8299	0.9761																									3.1401	0.4191	2.098	1.7089	0.3532	0.4101	6.1335	3.0882
				3.869	1.2381	6.2605	11.5342	4.1424	2.396	1	0.5321	1.0532	3.4612	0.3506	1.1777	1.9426	3.6844																									3.3696	0.4688	4.7761	2.6607	0.4508	0.5229	18.5743	9.7654
[truncated: 29 more columns]

## Sheet: mean & SD (per cell in %)
	No ISIs B1	No ISIs B2	No ISIs B3	No ISIs B4	No ISIs B5	No ISIs B6	No ISIs B7	No ISIs B8	No ISIs B9	No ISIs B10	No ISIs B11	No ISIs B12	No ISIs B13	No ISIs B14	No ISIs B15	No ISIs B16	No ISIs B17	No ISIs B18	No ISIs B19	No ISIs B20
Average No ISIs (%) all WT cells	0	0.0860585	12.0482	14.716	9.1222	6.88468	6.28227	7.22892	6.79862	7.91738	10.4131	6.36833	3.87263	3.18417	2.23752	0.946644	0.774527	0.688468	0.258176	0.172117
SD No ISIs (%) all WT cells	0	0.322001	9.55712	6.85109	6.85981	4.49384	3.28014	4.74926	3.99893	2.1508	4.02675	2.38301	2.06954	2.52757	1.88182	1.0754	1.30339	1.02606	0.697511	0.644003
s.e.m. No ISIs (%) all WT cells	0	0.0860967	2.55538	1.83184	1.83417	1.20156	0.877042	1.26986	1.06923	0.57508	1.07667	0.637169	0.553352	0.67582	0.50316	0.28754	0.348501	0.274348	0.1865	0.172193
Average No ISIs (%) all cKO cells	0.0803213	0	12.4498	13.1727	7.46988	2.40964	2.6506	2.97189	4.81928	7.63052	11.4859	11.4859	8.51406	4.81928	2.89157	2.16867	1.92771	0.722892	1.1245	1.20482
SD No ISIs (%) all cKO cells	0.311083	0	14.7957	9.31544	8.46074	1.93201	3.84249	3.96642	5.86715	6.17146	7.52226	5.28841	5.35853	4.64397	3.85865	2.37497	2.90873	0.997685	2.42964	2.40964
s.e.m. No ISIs (%) all cKO cells	0.0803832	0	3.82319	2.40709	2.18624	0.499227	0.992892	1.02491	1.51606	1.59469	1.94374	1.36651	1.38463	1.19999	0.997067	0.613686	0.751609	0.2578	0.627813	0.622646
p-value (chi square test)	0.3340	0.3006	0.7785	0.3105	0.1589	2.8664E-07	2.2086E-05	1.0653E-07	0.1347	0.8008	0.4271	2.9338E-05	5.5438E-06	0.0458	0.3178	0.0287	8.4155E-03	0.9200	0.0115	2.5904E-03
