# Supplementary material for: The Cl--channel TMEM16A is involved in the generation of cochlear Ca2+ waves and promotes the refinement of auditory brainstem networks in mice
Source: eLife. 2022 Feb 7;11:e72251. doi: 10.7554/eLife.72251 (PMC8871368; doi:10.7554/eLife.72251)
Supplement: Figure 2—source data 2. [file elife-72251-fig2-data2.xlsx]

## Sheet: Coefficient of variation
WT	cKO
7.12	1.26
3.11	1.09
3.6	1.58
4.29	2.28
2.66	0.96
2.87	1.18
2.85	2.92
3.54	2.98
3.73	3.32
3.37	1.7
3.76	1
1.75	5.92
2.44	2.64
2.65	3.29
	1.62

## Sheet: Cumulative distribution of ISIs
WT ISIs	WT %	cKO ISIs	cKO %
0.001	0.086	0.001	0.08
0.002	0.172	0.002	0.161
0.002	0.258	0.002	0.241
0.003	0.344	0.002	0.321
0.003	0.43	0.002	0.402
0.003	0.516	0.002	0.482
0.003	0.602	0.002	0.562
0.003	0.688	0.002	0.643
0.003	0.775	0.002	0.723
0.003	0.861	0.002	0.803
0.003	0.947	0.003	0.884
0.003	1.033	0.003	0.964
0.003	1.119	0.003	1.044
0.003	1.205	0.003	1.124
0.003	1.291	0.003	1.205
0.003	1.377	0.003	1.285
0.003	1.463	0.003	1.365
0.003	1.549	0.003	1.446
0.003	1.635	0.003	1.526
0.003	1.721	0.003	1.606
0.003	1.807	0.003	1.687
0.003	1.893	0.003	1.767
0.003	1.979	0.003	1.847
0.003	2.065	0.003	1.928
0.003	2.151	0.003	2.008
0.003	2.238	0.003	2.088
0.003	2.324	0.003	2.169
0.003	2.41	0.003	2.249
0.003	2.496	0.003	2.329
0.003	2.582	0.003	2.41
0.003	2.668	0.003	2.49
0.003	2.754	0.003	2.57
0.003	2.84	0.003	2.651
0.003	2.926	0.003	2.731
0.003	3.012	0.003	2.811
0.003	3.098	0.003	2.892
0.003	3.184	0.003	2.972
0.003	3.27	0.003	3.052
0.003	3.356	0.003	3.133
0.003	3.442	0.003	3.213
0.003	3.528	0.003	3.293
0.003	3.614	0.003	3.373
0.003	3.701	0.003	3.454
0.003	3.787	0.003	3.534
0.003	3.873	0.003	3.614
0.003	3.959	0.003	3.695
0.003	4.045	0.003	3.775
0.003	4.131	0.003	3.855
0.003	4.217	0.003	3.936
0.003	4.303	0.003	4.016
0.003	4.389	0.003	4.096
0.003	4.475	0.003	4.177
0.003	4.561	0.003	4.257
0.003	4.647	0.003	4.337
0.003	4.733	0.003	4.418
0.003	4.819	0.003	4.498
0.003	4.905	0.003	4.578
0.003	4.991	0.003	4.659
0.003	5.077	0.003	4.739
0.003	5.164	0.003	4.819
0.003	5.25	0.003	4.9
0.003	5.336	0.003	4.98
0.003	5.422	0.003	5.06
0.003	5.508	0.003	5.141
0.003	5.594	0.003	5.221
0.003	5.68	0.003	5.301
0.003	5.766	0.003	5.382
0.003	5.852	0.003	5.462
0.003	5.938	0.003	5.542
0.003	6.024	0.003	5.622
0.003	6.11	0.003	5.703
0.003	6.196	0.003	5.783
0.003	6.282	0.003	5.863
0.004	6.368	0.003	5.944
0.004	6.454	0.003	6.024
0.004	6.54	0.003	6.104
0.004	6.627	0.003	6.185
0.004	6.713	0.003	6.265
0.004	6.799	0.003	6.345
0.004	6.885	0.003	6.426
0.004	6.971	0.003	6.506
0.004	7.057	0.003	6.586
0.004	7.143	0.003	6.667
0.004	7.229	0.003	6.747
0.004	7.315	0.003	6.827
0.004	7.401	0.003	6.908
0.004	7.487	0.003	6.988
0.004	7.573	0.003	7.068
0.004	7.659	0.003	7.149
0.004	7.745	0.003	7.229
0.004	7.831	0.003	7.309
0.004	7.917	0.003	7.39
0.004	8.003	0.003	7.47
0.004	8.09	0.003	7.55
0.004	8.176	0.003	7.631
0.004	8.262	0.003	7.711
0.004	8.348	0.003	7.791
0.004	8.434	0.004	7.871
0.004	8.52	0.004	7.952
0.004	8.606	0.004	8.032
0.004	8.692	0.004	8.112
0.004	8.778	0.004	8.193
0.004	8.864	0.004	8.273
0.004	8.95	0.004	8.353
0.004	9.036	0.004	8.434
0.004	9.122	0.004	8.514
0.004	9.208	0.004	8.594
0.004	9.294	0.004	8.675
0.004	9.38	0.004	8.755
0.004	9.466	0.004	8.835
0.004	9.552	0.004	8.916
0.004	9.639	0.004	8.996
0.004	9.725	0.004	9.076
0.004	9.811	0.004	9.157
0.004	9.897	0.004	9.237
0.004	9.983	0.004	9.317
0.004	10.069	0.004	9.398
0.004	10.155	0.004	9.478
0.004	10.241	0.004	9.558
0.004	10.327	0.004	9.639
0.004	10.413	0.004	9.719
0.004	10.499	0.004	9.799
0.004	10.585	0.004	9.88
0.004	10.671	0.004	9.96
0.004	10.757	0.004	10.04
0.004	10.843	0.004	10.12
0.004	10.929	0.004	10.201
0.004	11.015	0.004	10.281
0.004	11.102	0.004	10.361
0.004	11.188	0.004	10.442
0.004	11.274	0.004	10.522
0.004	11.36	0.004	10.602
0.004	11.446	0.004	10.683
0.004	11.532	0.004	10.763
0.004	11.618	0.004	10.843
0.004	11.704	0.004	10.924
0.004	11.79	0.004	11.004
0.004	11.876	0.004	11.084
0.004	11.962	0.004	11.165
0.004	12.048	0.004	11.245
0.004	12.134	0.004	11.325
0.004	12.22	0.004	11.406
0.004	12.306	0.004	11.486
0.004	12.392	0.004	11.566
0.004	12.478	0.004	11.647
0.004	12.565	0.004	11.727
0.004	12.651	0.004	11.807
0.004	12.737	0.004	11.888
0.004	12.823	0.004	11.968
0.004	12.909	0.004	12.048
0.004	12.995	0.004	12.129
0.004	13.081	0.004	12.209
0.004	13.167	0.004	12.289
0.004	13.253	0.004	12.369
0.004	13.339	0.004	12.45
0.004	13.425	0.004	12.53
0.004	13.511	0.004	12.61
0.004	13.597	0.004	12.691
0.004	13.683	0.004	12.771
0.004	13.769	0.004	12.851
0.004	13.855	0.004	12.932
0.004	13.941	0.004	13.012
0.004	14.028	0.004	13.092
0.004	14.114	0.004	13.173
0.004	14.2	0.004	13.253
0.004	14.286	0.004	13.333
0.004	14.372	0.004	13.414
0.004	14.458	0.004	13.494
0.004	14.544	0.004	13.574
0.004	14.63	0.004	13.655
0.004	14.716	0.004	13.735
0.004	14.802	0.004	13.815
0.004	14.888	0.004	13.896
0.004	14.974	0.004	13.976
0.004	15.06	0.004	14.056
0.004	15.146	0.004	14.137
0.004	15.232	0.004	14.217
0.004	15.318	0.004	14.297
0.004	15.404	0.004	14.378
0.004	15.491	0.004	14.458
0.004	15.577	0.004	14.538
0.004	15.663	0.004	14.618
0.004	15.749	0.004	14.699
0.004	15.835	0.004	14.779
0.004	15.921	0.004	14.859
0.004	16.007	0.004	14.94
0.004	16.093	0.004	15.02
0.005	16.179	0.004	15.1
0.005	16.265	0.004	15.181
0.005	16.351	0.004	15.261
0.005	16.437	0.004	15.341
0.005	16.523	0.004	15.422
0.005	16.609	0.004	15.502
0.005	16.695	0.004	15.582
0.005	16.781	0.004	15.663
0.005	16.867	0.004	15.743
0.005	16.954	0.004	15.823
0.005	17.04	0.004	15.904
0.005	17.126	0.004	15.984
0.005	17.212	0.004	16.064
0.005	17.298	0.004	16.145
0.005	17.384	0.004	16.225
0.005	17.47	0.004	16.305
0.005	17.556	0.004	16.386
0.005	17.642	0.004	16.466
0.005	17.728	0.004	16.546
0.005	17.814	0.004	16.627
0.005	17.9	0.004	16.707
0.005	17.986	0.004	16.787
0.005	18.072	0.004	16.867
0.005	18.158	0.005	16.948
0.005	18.244	0.005	17.028
0.005	18.33	0.005	17.108
0.005	18.417	0.005	17.189
0.005	18.503	0.005	17.269
0.005	18.589	0.005	17.349
0.005	18.675	0.005	17.43
0.005	18.761	0.005	17.51
0.005	18.847	0.005	17.59
0.005	18.933	0.005	17.671
0.005	19.019	0.005	17.751
0.005	19.105	0.005	17.831
0.005	19.191	0.005	17.912
0.005	19.277	0.005	17.992
0.005	19.363	0.005	18.072
0.005	19.449	0.005	18.153
0.005	19.535	0.005	18.233
0.005	19.621	0.005	18.313
0.005	19.707	0.005	18.394
0.005	19.793	0.005	18.474
0.005	19.88	0.005	18.554
0.005	19.966	0.005	18.635
0.005	20.052	0.005	18.715
0.005	20.138	0.005	18.795
0.005	20.224	0.005	18.876
0.005	20.31	0.005	18.956
0.005	20.396	0.005	19.036
0.005	20.482	0.005	19.116
0.005	20.568	0.005	19.197
0.005	20.654	0.005	19.277
0.005	20.74	0.005	19.357
0.005	20.826	0.005	19.438
0.005	20.912	0.005	19.518
0.005	20.998	0.005	19.598
0.005	21.084	0.005	19.679
0.005	21.17	0.005	19.759
0.005	21.256	0.005	19.839
0.005	21.343	0.005	19.92
0.005	21.429	0.005	20
0.005	21.515	0.005	20.08
0.005	21.601	0.005	20.161
0.005	21.687	0.005	20.241
0.005	21.773	0.005	20.321
0.005	21.859	0.005	20.402
0.005	21.945	0.005	20.482
0.005	22.031	0.005	20.562
0.005	22.117	0.005	20.643
0.005	22.203	0.005	20.723
0.005	22.289	0.005	20.803
0.005	22.375	0.005	20.884
0.005	22.461	0.005	20.964
0.006	22.547	0.005	21.044
0.006	22.633	0.005	21.124
0.006	22.719	0.005	21.205
0.006	22.806	0.005	21.285
0.006	22.892	0.005	21.365
0.006	22.978	0.005	21.446
0.006	23.064	0.005	21.526
0.006	23.15	0.005	21.606
0.006	23.236	0.005	21.687
0.006	23.322	0.005	21.767
0.006	23.408	0.005	21.847
0.006	23.494	0.005	21.928
0.006	23.58	0.005	22.008
0.006	23.666	0.005	22.088
0.006	23.752	0.005	22.169
0.006	23.838	0.005	22.249
0.006	23.924	0.005	22.329
0.006	24.01	0.006	22.41
0.006	24.096	0.006	22.49
0.006	24.182	0.006	22.57
0.006	24.269	0.006	22.651
0.006	24.355	0.006	22.731
0.006	24.441	0.006	22.811
0.006	24.527	0.006	22.892
0.006	24.613	0.006	22.972
0.006	24.699	0.006	23.052
0.006	24.785	0.006	23.133
0.006	24.871	0.006	23.213
0.006	24.957	0.006	23.293
0.006	25.043	0.006	23.373
0.006	25.129	0.006	23.454
0.006	25.215	0.006	23.534
0.006	25.301	0.006	23.614
0.006	25.387	0.006	23.695
0.006	25.473	0.006	23.775
0.006	25.559	0.006	23.855
0.006	25.645	0.006	23.936
0.006	25.731	0.006	24.016
0.006	25.818	0.006	24.096
0.006	25.904	0.006	24.177
0.006	25.99	0.006	24.257
0.006	26.076	0.006	24.337
0.006	26.162	0.006	24.418
0.006	26.248	0.006	24.498
0.006	26.334	0.006	24.578
0.006	26.42	0.006	24.659
0.006	26.506	0.006	24.739
0.006	26.592	0.006	24.819
0.006	26.678	0.006	24.9
0.006	26.764	0.006	24.98
0.006	26.85	0.006	25.06
0.006	26.936	0.006	25.141
0.006	27.022	0.006	25.221
0.006	27.108	0.006	25.301
0.006	27.194	0.006	25.382
0.006	27.281	0.006	25.462
0.007	27.367	0.006	25.542
0.007	27.453	0.006	25.622
0.007	27.539	0.006	25.703
0.007	27.625	0.006	25.783
0.007	27.711	0.006	25.863
0.007	27.797	0.006	25.944
0.007	27.883	0.007	26.024
0.007	27.969	0.007	26.104
0.007	28.055	0.007	26.185
0.007	28.141	0.007	26.265
0.007	28.227	0.007	26.345
0.007	28.313	0.007	26.426
0.007	28.399	0.007	26.506
0.007	28.485	0.007	26.586
0.007	28.571	0.007	26.667
0.007	28.657	0.007	26.747
0.007	28.744	0.007	26.827
0.007	28.83	0.007	26.908
0.007	28.916	0.007	26.988
0.007	29.002	0.007	27.068
0.007	29.088	0.007	27.149
0.007	29.174	0.007	27.229
0.007	29.26	0.007	27.309
0.007	29.346	0.007	27.39
0.007	29.432	0.007	27.47
0.007	29.518	0.007	27.55
0.007	29.604	0.007	27.631
0.007	29.69	0.007	27.711
0.007	29.776	0.007	27.791
0.007	29.862	0.007	27.871
0.007	29.948	0.007	27.952
0.007	30.034	0.007	28.032
0.008	30.12	0.007	28.112
0.008	30.207	0.007	28.193
0.008	30.293	0.007	28.273
0.008	30.379	0.007	28.353
0.008	30.465	0.007	28.434
0.008	30.551	0.007	28.514
0.008	30.637	0.007	28.594
0.008	30.723	0.008	28.675
0.008	30.809	0.008	28.755
0.008	30.895	0.008	28.835
0.008	30.981	0.008	28.916
0.008	31.067	0.008	28.996
0.008	31.153	0.008	29.076
0.008	31.239	0.008	29.157
0.008	31.325	0.008	29.237
0.008	31.411	0.008	29.317
0.008	31.497	0.008	29.398
0.008	31.583	0.008	29.478
0.008	31.67	0.008	29.558
0.008	31.756	0.008	29.639
0.008	31.842	0.008	29.719
0.008	31.928	0.008	29.799
0.008	32.014	0.008	29.88
0.008	32.1	0.008	29.96
0.009	32.186	0.008	30.04
0.009	32.272	0.008	30.12
0.009	32.358	0.008	30.201
0.009	32.444	0.008	30.281
0.009	32.53	0.008	30.361
0.009	32.616	0.008	30.442
0.009	32.702	0.008	30.522
0.009	32.788	0.008	30.602
0.009	32.874	0.008	30.683
0.009	32.96	0.008	30.763
0.009	33.046	0.009	30.843
0.009	33.133	0.009	30.924
0.009	33.219	0.009	31.004
0.009	33.305	0.009	31.084
0.009	33.391	0.009	31.165
0.009	33.477	0.009	31.245
0.009	33.563	0.009	31.325
0.009	33.649	0.009	31.406
0.009	33.735	0.009	31.486
0.009	33.821	0.009	31.566
0.009	33.907	0.009	31.647
0.009	33.993	0.009	31.727
0.009	34.079	0.009	31.807
0.009	34.165	0.009	31.888
0.009	34.251	0.009	31.968
0.009	34.337	0.009	32.048
0.009	34.423	0.009	32.129
0.009	34.509	0.009	32.209
0.009	34.596	0.009	32.289
0.009	34.682	0.009	32.369
0.009	34.768	0.009	32.45
0.01	34.854	0.009	32.53
0.01	34.94	0.01	32.61
0.01	35.026	0.01	32.691
0.01	35.112	0.01	32.771
0.01	35.198	0.01	32.851
0.01	35.284	0.01	32.932
0.01	35.37	0.01	33.012
0.01	35.456	0.01	33.092
0.01	35.542	0.01	33.173
0.01	35.628	0.01	33.253
0.01	35.714	0.01	33.333
0.01	35.8	0.01	33.414
0.01	35.886	0.01	33.494
0.01	35.972	0.01	33.574
0.01	36.059	0.011	33.655
0.01	36.145	0.011	33.735
0.01	36.231	0.011	33.815
0.01	36.317	0.011	33.896
0.01	36.403	0.011	33.976
0.01	36.489	0.011	34.056
0.011	36.575	0.011	34.137
0.011	36.661	0.012	34.217
0.011	36.747	0.012	34.297
0.011	36.833	0.012	34.378
0.011	36.919	0.012	34.458
0.011	37.005	0.012	34.538
0.011	37.091	0.012	34.618
0.011	37.177	0.012	34.699
0.011	37.263	0.012	34.779
0.011	37.349	0.012	34.859
0.011	37.435	0.013	34.94
0.011	37.522	0.013	35.02
0.011	37.608	0.013	35.1
0.011	37.694	0.013	35.181
0.011	37.78	0.014	35.261
0.011	37.866	0.014	35.341
0.011	37.952	0.014	35.422
0.011	38.038	0.015	35.502
0.011	38.124	0.016	35.582
0.011	38.21	0.016	35.663
0.011	38.296	0.016	35.743
0.012	38.382	0.017	35.823
0.012	38.468	0.018	35.904
0.012	38.554	0.018	35.984
0.012	38.64	0.018	36.064
0.012	38.726	0.019	36.145
0.012	38.812	0.019	36.225
0.012	38.898	0.019	36.305
0.012	38.985	0.019	36.386
0.012	39.071	0.019	36.466
0.012	39.157	0.019	36.546
0.012	39.243	0.02	36.627
0.012	39.329	0.02	36.707
0.012	39.415	0.02	36.787
0.012	39.501	0.02	36.867
0.012	39.587	0.02	36.948
0.012	39.673	0.021	37.028
0.012	39.759	0.021	37.108
0.012	39.845	0.021	37.189
0.013	39.931	0.021	37.269
0.013	40.017	0.022	37.349
0.013	40.103	0.022	37.43
0.013	40.189	0.022	37.51
0.013	40.275	0.022	37.59
0.013	40.361	0.022	37.671
0.013	40.448	0.022	37.751
0.013	40.534	0.023	37.831
0.013	40.62	0.024	37.912
0.013	40.706	0.024	37.992
0.013	40.792	0.025	38.072
0.014	40.878	0.025	38.153
0.014	40.964	0.025	38.233
0.014	41.05	0.025	38.313
0.014	41.136	0.026	38.394
0.014	41.222	0.027	38.474
0.014	41.308	0.027	38.554
0.015	41.394	0.027	38.635
0.015	41.48	0.027	38.715
0.015	41.566	0.028	38.795
0.015	41.652	0.029	38.876
0.015	41.738	0.029	38.956
0.015	41.824	0.029	39.036
0.015	41.91	0.029	39.116
0.015	41.997	0.03	39.197
0.015	42.083	0.03	39.277
0.015	42.169	0.03	39.357
0.016	42.255	0.031	39.438
0.016	42.341	0.031	39.518
0.016	42.427	0.031	39.598
0.016	42.513	0.031	39.679
0.016	42.599	0.032	39.759
0.016	42.685	0.032	39.839
0.016	42.771	0.034	39.92
0.016	42.857	0.034	40
0.016	42.943	0.035	40.08
0.016	43.029	0.036	40.161
0.016	43.115	0.037	40.241
0.016	43.201	0.037	40.321
0.016	43.287	0.037	40.402
0.017	43.373	0.037	40.482
0.017	43.46	0.037	40.562
0.017	43.546	0.037	40.643
0.017	43.632	0.038	40.723
0.017	43.718	0.039	40.803
0.017	43.804	0.039	40.884
0.017	43.89	0.039	40.964
0.017	43.976	0.039	41.044
0.017	44.062	0.039	41.124
0.017	44.148	0.039	41.205
0.017	44.234	0.04	41.285
0.017	44.32	0.04	41.365
0.018	44.406	0.041	41.446
0.018	44.492	0.041	41.526
0.018	44.578	0.042	41.606
0.018	44.664	0.042	41.687
0.018	44.75	0.043	41.767
0.018	44.836	0.043	41.847
0.018	44.923	0.044	41.928
0.019	45.009	0.044	42.008
0.019	45.095	0.044	42.088
0.019	45.181	0.045	42.169
0.019	45.267	0.045	42.249
0.019	45.353	0.046	42.329
0.019	45.439	0.046	42.41
0.019	45.525	0.047	42.49
0.019	45.611	0.047	42.57
0.02	45.697	0.048	42.651
0.02	45.783	0.049	42.731
0.02	45.869	0.049	42.811
0.02	45.955	0.05	42.892
0.02	46.041	0.05	42.972
0.021	46.127	0.05	43.052
0.021	46.213	0.051	43.133
0.021	46.299	0.051	43.213
0.021	46.386	0.051	43.293
0.021	46.472	0.051	43.373
0.021	46.558	0.052	43.454
0.021	46.644	0.053	43.534
0.022	46.73	0.053	43.614
0.022	46.816	0.054	43.695
0.022	46.902	0.054	43.775
0.022	46.988	0.054	43.855
0.022	47.074	0.054	43.936
0.022	47.16	0.055	44.016
0.022	47.246	0.056	44.096
0.022	47.332	0.057	44.177
0.022	47.418	0.057	44.257
0.022	47.504	0.057	44.337
0.022	47.59	0.058	44.418
0.022	47.676	0.058	44.498
0.023	47.762	0.058	44.578
0.023	47.849	0.058	44.659
0.023	47.935	0.058	44.739
0.023	48.021	0.059	44.819
0.024	48.107	0.059	44.9
0.024	48.193	0.059	44.98
0.024	48.279	0.059	45.06
0.024	48.365	0.059	45.141
0.024	48.451	0.059	45.221
0.024	48.537	0.06	45.301
0.025	48.623	0.06	45.382
0.025	48.709	0.06	45.462
0.025	48.795	0.06	45.542
0.025	48.881	0.061	45.622
0.025	48.967	0.061	45.703
0.025	49.053	0.061	45.783
0.025	49.139	0.062	45.863
0.025	49.225	0.062	45.944
0.025	49.312	0.063	46.024
0.026	49.398	0.063	46.104
0.026	49.484	0.064	46.185
0.026	49.57	0.064	46.265
0.026	49.656	0.064	46.345
0.026	49.742	0.065	46.426
0.026	49.828	0.066	46.506
0.027	49.914	0.066	46.586
0.027	50	0.066	46.667
0.027	50.086	0.066	46.747
0.027	50.172	0.067	46.827
0.027	50.258	0.067	46.908
0.027	50.344	0.067	46.988
0.028	50.43	0.067	47.068
0.028	50.516	0.068	47.149
0.028	50.602	0.068	47.229
0.028	50.688	0.069	47.309
0.029	50.775	0.069	47.39
0.029	50.861	0.069	47.47
0.029	50.947	0.069	47.55
0.029	51.033	0.069	47.631
0.03	51.119	0.07	47.711
0.03	51.205	0.07	47.791
0.03	51.291	0.07	47.871
0.03	51.377	0.07	47.952
0.03	51.463	0.071	48.032
0.03	51.549	0.071	48.112
0.03	51.635	0.071	48.193
0.031	51.721	0.071	48.273
0.031	51.807	0.072	48.353
0.031	51.893	0.072	48.434
0.031	51.979	0.072	48.514
0.031	52.065	0.072	48.594
0.031	52.151	0.072	48.675
0.031	52.238	0.072	48.755
0.032	52.324	0.073	48.835
0.032	52.41	0.073	48.916
0.032	52.496	0.073	48.996
0.032	52.582	0.073	49.076
0.032	52.668	0.074	49.157
0.033	52.754	0.074	49.237
0.033	52.84	0.074	49.317
0.033	52.926	0.075	49.398
0.033	53.012	0.075	49.478
0.033	53.098	0.075	49.558
0.033	53.184	0.075	49.639
0.034	53.27	0.075	49.719
0.034	53.356	0.076	49.799
0.034	53.442	0.076	49.88
0.034	53.528	0.076	49.96
0.034	53.614	0.076	50.04
0.034	53.701	0.077	50.12
0.034	53.787	0.077	50.201
0.034	53.873	0.078	50.281
0.035	53.959	0.078	50.361
0.035	54.045	0.079	50.442
0.035	54.131	0.08	50.522
0.035	54.217	0.081	50.602
0.035	54.303	0.081	50.683
0.036	54.389	0.083	50.763
0.036	54.475	0.083	50.843
0.036	54.561	0.084	50.924
0.036	54.647	0.084	51.004
0.037	54.733	0.084	51.084
0.037	54.819	0.084	51.165
0.037	54.905	0.085	51.245
0.037	54.991	0.085	51.325
0.037	55.077	0.085	51.406
0.038	55.164	0.086	51.486
0.038	55.25	0.086	51.566
0.038	55.336	0.086	51.647
0.038	55.422	0.088	51.727
0.038	55.508	0.088	51.807
0.038	55.594	0.09	51.888
0.038	55.68	0.091	51.968
0.039	55.766	0.091	52.048
0.039	55.852	0.091	52.129
0.039	55.938	0.091	52.209
0.039	56.024	0.091	52.289
0.039	56.11	0.092	52.369
0.039	56.196	0.092	52.45
0.039	56.282	0.092	52.53
0.04	56.368	0.092	52.61
0.04	56.454	0.092	52.691
0.041	56.54	0.094	52.771
0.041	56.627	0.094	52.851
0.042	56.713	0.094	52.932
0.042	56.799	0.096	53.012
0.042	56.885	0.097	53.092
0.043	56.971	0.097	53.173
0.043	57.057	0.097	53.253
0.043	57.143	0.099	53.333
0.043	57.229	0.099	53.414
0.043	57.315	0.099	53.494
0.043	57.401	0.1	53.574
0.043	57.487	0.1	53.655
0.044	57.573	0.1	53.735
0.044	57.659	0.101	53.815
0.045	57.745	0.102	53.896
0.045	57.831	0.102	53.976
0.045	57.917	0.102	54.056
0.045	58.003	0.103	54.137
0.045	58.09	0.103	54.217
0.045	58.176	0.103	54.297
0.045	58.262	0.103	54.378
0.045	58.348	0.104	54.458
0.045	58.434	0.104	54.538
0.045	58.52	0.104	54.618
0.046	58.606	0.105	54.699
0.046	58.692	0.105	54.779
0.047	58.778	0.105	54.859
0.047	58.864	0.105	54.94
0.048	58.95	0.105	55.02
0.049	59.036	0.106	55.1
0.049	59.122	0.106	55.181
0.049	59.208	0.106	55.261
0.049	59.294	0.106	55.341
0.05	59.38	0.106	55.422
0.05	59.466	0.106	55.502
0.05	59.552	0.107	55.582
0.05	59.639	0.107	55.663
0.051	59.725	0.108	55.743
0.051	59.811	0.108	55.823
0.051	59.897	0.109	55.904
0.052	59.983	0.11	55.984
0.052	60.069	0.11	56.064
0.052	60.155	0.11	56.145
0.052	60.241	0.111	56.225
0.053	60.327	0.112	56.305
0.053	60.413	0.112	56.386
0.053	60.499	0.113	56.466
0.054	60.585	0.113	56.546
0.054	60.671	0.113	56.627
0.054	60.757	0.113	56.707
0.054	60.843	0.115	56.787
0.054	60.929	0.115	56.867
0.054	61.015	0.115	56.948
0.054	61.102	0.116	57.028
0.054	61.188	0.116	57.108
0.055	61.274	0.117	57.189
0.055	61.36	0.117	57.269
0.056	61.446	0.117	57.349
0.056	61.532	0.117	57.43
0.057	61.618	0.119	57.51
0.057	61.704	0.119	57.59
0.057	61.79	0.12	57.671
0.057	61.876	0.12	57.751
0.057	61.962	0.12	57.831
0.058	62.048	0.12	57.912
0.058	62.134	0.121	57.992
0.059	62.22	0.122	58.072
0.06	62.306	0.122	58.153
0.06	62.392	0.123	58.233
0.06	62.478	0.123	58.313
0.061	62.565	0.123	58.394
0.061	62.651	0.124	58.474
0.061	62.737	0.124	58.554
0.061	62.823	0.125	58.635
0.062	62.909	0.125	58.715
0.062	62.995	0.125	58.795
0.063	63.081	0.126	58.876
0.063	63.167	0.126	58.956
0.064	63.253	0.126	59.036
0.064	63.339	0.127	59.116
0.064	63.425	0.128	59.197
0.064	63.511	0.128	59.277
0.065	63.597	0.128	59.357
0.065	63.683	0.129	59.438
0.065	63.769	0.129	59.518
0.066	63.855	0.13	59.598
0.066	63.941	0.13	59.679
0.066	64.028	0.13	59.759
0.067	64.114	0.13	59.839
0.067	64.2	0.13	59.92
0.067	64.286	0.13	60
0.068	64.372	0.13	60.08
0.068	64.458	0.131	60.161
0.069	64.544	0.131	60.241
0.069	64.63	0.131	60.321
0.069	64.716	0.132	60.402
0.07	64.802	0.132	60.482
0.071	64.888	0.133	60.562
0.073	64.974	0.134	60.643
0.075	65.06	0.134	60.723
0.075	65.146	0.135	60.803
0.075	65.232	0.135	60.884
0.076	65.318	0.135	60.964
0.076	65.404	0.135	61.044
0.077	65.491	0.137	61.124
0.077	65.577	0.138	61.205
0.078	65.663	0.138	61.285
0.078	65.749	0.139	61.365
0.079	65.835	0.139	61.446
0.079	65.921	0.139	61.526
0.08	66.007	0.14	61.606
0.08	66.093	0.141	61.687
0.08	66.179	0.141	61.767
0.08	66.265	0.141	61.847
0.081	66.351	0.141	61.928
0.081	66.437	0.141	62.008
0.081	66.523	0.142	62.088
0.082	66.609	0.144	62.169
0.082	66.695	0.144	62.249
0.082	66.781	0.144	62.329
0.083	66.867	0.144	62.41
0.083	66.954	0.145	62.49
0.084	67.04	0.145	62.57
0.084	67.126	0.145	62.651
0.084	67.212	0.146	62.731
0.084	67.298	0.146	62.811
0.084	67.384	0.146	62.892
0.084	67.47	0.147	62.972
0.084	67.556	0.147	63.052
0.084	67.642	0.147	63.133
0.085	67.728	0.148	63.213
0.085	67.814	0.148	63.293
0.086	67.9	0.148	63.373
0.086	67.986	0.149	63.454
0.087	68.072	0.149	63.534
0.087	68.158	0.15	63.614
0.087	68.244	0.15	63.695
0.088	68.33	0.15	63.775
0.089	68.417	0.151	63.855
0.089	68.503	0.151	63.936
0.089	68.589	0.153	64.016
0.09	68.675	0.153	64.096
0.09	68.761	0.154	64.177
0.09	68.847	0.155	64.257
0.09	68.933	0.155	64.337
0.09	69.019	0.155	64.418
0.091	69.105	0.156	64.498
0.091	69.191	0.156	64.578
0.091	69.277	0.157	64.659
0.091	69.363	0.157	64.739
0.091	69.449	0.157	64.819
0.092	69.535	0.157	64.9
0.092	69.621	0.158	64.98
0.092	69.707	0.158	65.06
0.094	69.793	0.158	65.141
0.094	69.88	0.159	65.221
0.094	69.966	0.16	65.301
0.094	70.052	0.16	65.382
0.095	70.138	0.16	65.462
0.095	70.224	0.161	65.542
0.095	70.31	0.161	65.622
0.097	70.396	0.161	65.703
0.097	70.482	0.162	65.783
0.097	70.568	0.163	65.863
0.098	70.654	0.164	65.944
0.098	70.74	0.164	66.024
0.098	70.826	0.164	66.104
0.099	70.912	0.165	66.185
0.099	70.998	0.165	66.265
0.1	71.084	0.165	66.345
0.1	71.17	0.165	66.426
0.101	71.256	0.166	66.506
0.101	71.343	0.166	66.586
0.101	71.429	0.167	66.667
0.101	71.515	0.167	66.747
0.101	71.601	0.167	66.827
0.101	71.687	0.169	66.908
0.102	71.773	0.169	66.988
0.102	71.859	0.169	67.068
0.103	71.945	0.17	67.149
0.104	72.031	0.17	67.229
0.104	72.117	0.171	67.309
0.104	72.203	0.171	67.39
0.104	72.289	0.171	67.47
0.104	72.375	0.171	67.55
0.104	72.461	0.172	67.631
0.105	72.547	0.172	67.711
0.105	72.633	0.172	67.791
0.105	72.719	0.172	67.871
0.106	72.806	0.172	67.952
0.106	72.892	0.173	68.032
0.106	72.978	0.173	68.112
0.106	73.064	0.174	68.193
0.106	73.15	0.174	68.273
0.106	73.236	0.174	68.353
0.106	73.322	0.175	68.434
0.107	73.408	0.176	68.514
0.108	73.494	0.177	68.594
0.108	73.58	0.178	68.675
0.108	73.666	0.178	68.755
0.108	73.752	0.178	68.835
0.108	73.838	0.181	68.916
0.109	73.924	0.181	68.996
0.109	74.01	0.181	69.076
0.109	74.096	0.182	69.157
0.109	74.182	0.184	69.237
0.11	74.269	0.185	69.317
0.11	74.355	0.186	69.398
0.111	74.441	0.186	69.478
0.112	74.527	0.187	69.558
0.112	74.613	0.187	69.639
0.112	74.699	0.188	69.719
0.112	74.785	0.188	69.799
0.113	74.871	0.188	69.88
0.113	74.957	0.189	69.96
0.116	75.043	0.191	70.04
0.116	75.129	0.191	70.12
0.116	75.215	0.192	70.201
0.117	75.301	0.192	70.281
0.117	75.387	0.193	70.361
0.117	75.473	0.193	70.442
0.117	75.559	0.195	70.522
0.118	75.645	0.195	70.602
0.119	75.731	0.195	70.683
0.119	75.818	0.195	70.763
0.119	75.904	0.196	70.843
0.12	75.99	0.197	70.924
0.121	76.076	0.197	71.004
0.121	76.162	0.198	71.084
0.122	76.248	0.198	71.165
0.122	76.334	0.198	71.245
0.122	76.42	0.2	71.325
0.123	76.506	0.2	71.406
0.123	76.592	0.2	71.486
0.123	76.678	0.201	71.566
0.123	76.764	0.202	71.647
0.124	76.85	0.203	71.727
0.124	76.936	0.203	71.807
0.124	77.022	0.204	71.888
0.125	77.108	0.204	71.968
0.125	77.194	0.205	72.048
0.126	77.281	0.206	72.129
0.126	77.367	0.206	72.209
0.127	77.453	0.206	72.289
0.127	77.539	0.207	72.369
0.127	77.625	0.208	72.45
0.128	77.711	0.211	72.53
0.128	77.797	0.211	72.61
0.129	77.883	0.212	72.691
0.131	77.969	0.212	72.771
0.131	78.055	0.212	72.851
0.131	78.141	0.212	72.932
0.133	78.227	0.214	73.012
0.133	78.313	0.215	73.092
0.133	78.399	0.216	73.173
0.134	78.485	0.216	73.253
0.134	78.571	0.222	73.333
0.135	78.657	0.224	73.414
0.135	78.744	0.224	73.494
0.135	78.83	0.224	73.574
0.137	78.916	0.224	73.655
0.139	79.002	0.225	73.735
0.14	79.088	0.225	73.815
0.14	79.174	0.226	73.896
0.141	79.26	0.226	73.976
0.141	79.346	0.227	74.056
0.142	79.432	0.228	74.137
0.143	79.518	0.229	74.217
0.143	79.604	0.229	74.297
0.143	79.69	0.229	74.378
0.145	79.776	0.229	74.458
0.145	79.862	0.231	74.538
0.145	79.948	0.231	74.618
0.145	80.034	0.233	74.699
0.146	80.12	0.233	74.779
0.147	80.207	0.234	74.859
0.147	80.293	0.235	74.94
0.147	80.379	0.236	75.02
0.147	80.465	0.236	75.1
0.148	80.551	0.24	75.181
0.149	80.637	0.24	75.261
0.151	80.723	0.24	75.341
0.151	80.809	0.242	75.422
0.151	80.895	0.242	75.502
0.153	80.981	0.243	75.582
0.154	81.067	0.244	75.663
0.154	81.153	0.244	75.743
0.155	81.239	0.244	75.823
0.157	81.325	0.245	75.904
0.158	81.411	0.245	75.984
0.159	81.497	0.246	76.064
0.159	81.583	0.246	76.145
0.161	81.67	0.249	76.225
0.162	81.756	0.249	76.305
0.164	81.842	0.25	76.386
0.164	81.928	0.25	76.466
0.167	82.014	0.251	76.546
0.17	82.1	0.251	76.627
0.17	82.186	0.252	76.707
0.171	82.272	0.256	76.787
0.172	82.358	0.257	76.867
0.172	82.444	0.261	76.948
0.172	82.53	0.261	77.028
0.172	82.616	0.261	77.108
0.173	82.702	0.263	77.189
0.175	82.788	0.263	77.269
0.175	82.874	0.265	77.349
0.177	82.96	0.266	77.43
0.177	83.046	0.268	77.51
0.177	83.133	0.269	77.59
0.177	83.219	0.274	77.671
0.178	83.305	0.276	77.751
0.178	83.391	0.28	77.831
0.179	83.477	0.28	77.912
0.18	83.563	0.281	77.992
0.182	83.649	0.281	78.072
0.182	83.735	0.282	78.153
0.183	83.821	0.283	78.233
0.183	83.907	0.284	78.313
0.184	83.993	0.285	78.394
0.184	84.079	0.285	78.474
0.186	84.165	0.289	78.554
0.187	84.251	0.29	78.635
0.188	84.337	0.291	78.715
0.19	84.423	0.294	78.795
0.194	84.509	0.295	78.876
0.194	84.596	0.295	78.956
0.195	84.682	0.297	79.036
0.195	84.768	0.298	79.116
0.197	84.854	0.3	79.197
0.197	84.94	0.301	79.277
0.197	85.026	0.305	79.357
0.199	85.112	0.305	79.438
0.202	85.198	0.305	79.518
0.202	85.284	0.306	79.598
0.203	85.37	0.306	79.679
0.204	85.456	0.31	79.759
0.206	85.542	0.31	79.839
0.207	85.628	0.311	79.92
0.208	85.714	0.314	80
0.211	85.8	0.314	80.08
0.212	85.886	0.315	80.161
0.213	85.972	0.317	80.241
0.214	86.059	0.318	80.321
0.218	86.145	0.318	80.402
0.219	86.231	0.318	80.482
0.22	86.317	0.319	80.562
0.22	86.403	0.319	80.643
0.221	86.489	0.319	80.723
0.221	86.575	0.319	80.803
0.222	86.661	0.322	80.884
0.222	86.747	0.323	80.964
0.224	86.833	0.325	81.044
0.224	86.919	0.326	81.124
0.225	87.005	0.326	81.205
0.227	87.091	0.326	81.285
0.227	87.177	0.328	81.365
0.229	87.263	0.329	81.446
0.23	87.349	0.33	81.526
0.23	87.435	0.33	81.606
0.234	87.522	0.331	81.687
0.236	87.608	0.333	81.767
0.236	87.694	0.334	81.847
0.237	87.78	0.336	81.928
0.241	87.866	0.339	82.008
0.254	87.952	0.339	82.088
0.255	88.038	0.34	82.169
0.255	88.124	0.343	82.249
0.265	88.21	0.344	82.329
0.27	88.296	0.344	82.41
0.273	88.382	0.346	82.49
0.273	88.468	0.347	82.57
0.273	88.554	0.349	82.651
0.276	88.64	0.35	82.731
0.276	88.726	0.353	82.811
0.287	88.812	0.353	82.892
0.287	88.898	0.354	82.972
0.289	88.985	0.355	83.052
0.292	89.071	0.355	83.133
0.295	89.157	0.358	83.213
0.302	89.243	0.36	83.293
0.303	89.329	0.361	83.373
0.308	89.415	0.367	83.454
0.309	89.501	0.37	83.534
0.31	89.587	0.371	83.614
0.311	89.673	0.373	83.695
0.314	89.759	0.373	83.775
0.322	89.845	0.374	83.855
0.325	89.931	0.376	83.936
0.325	90.017	0.378	84.016
0.328	90.103	0.381	84.096
0.332	90.189	0.382	84.177
0.345	90.275	0.391	84.257
0.349	90.361	0.391	84.337
0.351	90.448	0.392	84.418
0.353	90.534	0.392	84.498
0.361	90.62	0.394	84.578
0.363	90.706	0.394	84.659
0.365	90.792	0.395	84.739
0.369	90.878	0.396	84.819
0.37	90.964	0.397	84.9
0.375	91.05	0.397	84.98
0.376	91.136	0.398	85.06
0.379	91.222	0.398	85.141
0.38	91.308	0.399	85.221
0.38	91.394	0.402	85.301
0.394	91.48	0.404	85.382
0.394	91.566	0.404	85.462
0.395	91.652	0.405	85.542
0.398	91.738	0.406	85.622
0.405	91.824	0.41	85.703
0.409	91.91	0.413	85.783
0.409	91.997	0.418	85.863
0.418	92.083	0.419	85.944
0.419	92.169	0.422	86.024
0.422	92.255	0.423	86.104
0.424	92.341	0.424	86.185
0.426	92.427	0.427	86.265
0.432	92.513	0.43	86.345
0.432	92.599	0.446	86.426
0.435	92.685	0.446	86.506
0.451	92.771	0.45	86.586
0.459	92.857	0.451	86.667
0.46	92.943	0.452	86.747
0.46	93.029	0.452	86.827
0.465	93.115	0.461	86.908
0.465	93.201	0.461	86.988
0.467	93.287	0.466	87.068
0.473	93.373	0.468	87.149
0.477	93.46	0.469	87.229
0.489	93.546	0.469	87.309
0.491	93.632	0.476	87.39
0.506	93.718	0.478	87.47
0.509	93.804	0.48	87.55
0.523	93.89	0.481	87.631
0.528	93.976	0.483	87.711
0.53	94.062	0.49	87.791
0.532	94.148	0.492	87.871
0.534	94.234	0.501	87.952
0.547	94.32	0.502	88.032
0.559	94.406	0.504	88.112
0.568	94.492	0.506	88.193
0.574	94.578	0.508	88.273
0.582	94.664	0.509	88.353
0.588	94.75	0.515	88.434
0.591	94.836	0.516	88.514
0.595	94.923	0.523	88.594
0.655	95.009	0.529	88.675
0.69	95.095	0.533	88.755
0.694	95.181	0.534	88.835
0.718	95.267	0.538	88.916
0.745	95.353	0.54	88.996
0.76	95.439	0.544	89.076
0.782	95.525	0.556	89.157
0.793	95.611	0.557	89.237
0.811	95.697	0.565	89.317
0.822	95.783	0.594	89.398
0.829	95.869	0.597	89.478
0.837	95.955	0.602	89.558
0.876	96.041	0.602	89.639
0.888	96.127	0.611	89.719
0.892	96.213	0.618	89.799
0.896	96.299	0.624	89.88
0.904	96.386	0.626	89.96
0.905	96.472	0.634	90.04
0.915	96.558	0.642	90.12
0.932	96.644	0.644	90.201
0.962	96.73	0.647	90.281
0.967	96.816	0.654	90.361
0.971	96.902	0.654	90.442
0.976	96.988	0.654	90.522
0.998	97.074	0.66	90.602
1	97.16	0.661	90.683
1.024	97.246	0.661	90.763
1.045	97.332	0.683	90.843
1.053	97.418	0.704	90.924
1.123	97.504	0.708	91.004
1.151	97.59	0.709	91.084
1.178	97.676	0.711	91.165
1.223	97.762	0.722	91.245
1.238	97.849	0.722	91.325
1.359	97.935	0.727	91.406
1.539	98.021	0.735	91.486
1.578	98.107	0.762	91.566
1.588	98.193	0.765	91.647
1.688	98.279	0.77	91.727
1.83	98.365	0.779	91.807
1.888	98.451	0.779	91.888
1.927	98.537	0.792	91.968
1.943	98.623	0.861	92.048
2.301	98.709	0.873	92.129
2.334	98.795	0.897	92.209
2.396	98.881	0.919	92.289
2.706	98.967	0.926	92.369
2.779	99.053	0.93	92.45
2.848	99.139	0.943	92.53
3.313	99.225	0.953	92.61
3.461	99.312	0.986	92.691
3.684	99.398	0.996	92.771
3.869	99.484	0.998	92.851
3.926	99.57	1.042	92.932
4.142	99.656	1.074	93.012
4.632	99.742	1.077	93.092
6.261	99.828	1.101	93.173
10.387	99.914	1.119	93.253
11.534	100	1.14	93.333
		1.175	93.414
		1.244	93.494
		1.249	93.574
		1.252	93.655
		1.26	93.735
		1.261	93.815
		1.293	93.896
		1.306	93.976
		1.318	94.056
		1.355	94.137
		1.359	94.217
		1.377	94.297
		1.381	94.378
		1.407	94.458
		1.407	94.538
		1.415	94.618
		1.42	94.699
		1.431	94.779
		1.467	94.859
		1.532	94.94
		1.563	95.02
		1.613	95.1
		1.632	95.181
		1.645	95.261
		1.677	95.341
		1.709	95.422
		1.734	95.502
		1.781	95.582
		1.84	95.663
		1.852	95.743
		1.866	95.823
		1.877	95.904
		1.878	95.984
		1.947	96.064
		1.957	96.145
		1.997	96.225
		2.026	96.305
		2.098	96.386
		2.124	96.466
		2.152	96.546
		2.188	96.627
		2.337	96.707
		2.363	96.787
		2.412	96.867
		2.429	96.948
		2.525	97.028
		2.56	97.108
		2.634	97.189
		2.661	97.269
		2.857	97.349
		3.088	97.43
		3.14	97.51
		3.37	97.59
		3.622	97.671
		4.406	97.751
		4.529	97.831
		4.541	97.912
		4.682	97.992
		4.776	98.072
		4.954	98.153
		4.983	98.233
		4.985	98.313
		5.398	98.394
		5.612	98.474
		5.615	98.554
		5.629	98.635
		5.639	98.715
		6.134	98.795
		6.352	98.876
		6.966	98.956
		7.148	99.036
		7.867	99.116
		8.349	99.197
		9.192	99.277
		9.765	99.357
		9.949	99.438
		10.287	99.518
		10.29	99.598
		11.828	99.679
		12.555	99.759
		18.107	99.839
		18.574	99.92
		18.773	100
