# Supplementary material for: The Cl--channel TMEM16A is involved in the generation of cochlear Ca2+ waves and promotes the refinement of auditory brainstem networks in mice
Source: eLife. 2022 Feb 7;11:e72251. doi: 10.7554/eLife.72251 (PMC8871368; doi:10.7554/eLife.72251)
Supplement: Figure 3—source data 1. [file elife-72251-fig3-data1.xlsx]

## Sheet: Bursts per 100s
WT	cKO
10	0
3.3	0
6.7	0
3.3	4.2
2.5	0
3.3	0
3.3	1.1
5.8	1.7
5.8	2.5
5	0.6
5	0
1.7	12.8
3.9	7.8
3.9	4.2
	0

## Sheet: APs per burst
WT	cKO
10	17
172	31
11	20
10	11
25	19
22	110
17	81
12	31
28	21
10	33
59	30
12	62
94	19
18	28
21	11
38	19
48	13
91	24
46	10
17	14
19	23
27	12
11	13
26	12
32	12
21	16
134	30
14	46
92	30
83	42
27	20
25	28
69	11
66	29
48	10
53	23
57	14
153	10
30	12
104	14
45	80
89	16
25	81
23	17
60	89
30	67
152	18
169	19
19	15
23	20
23	21
73	17
10	17
12	32
10	10
83	75
87	54
132	13
90	17
25	14
68
77
25
142
189
180
50
70
58
134
87
33
135
34
105
108
18
19
139
107
100
83
18
21
44

## Sheet: Burst duration
WT	cKO
0.062	0.59
4.1	1.8
0.08	1
0.074	0.31
0.37	0.93
0.3	12
0.29	9.5
0.18	2.3
0.82	1.6
0.063	3.1
0.75	3.5
0.16	9.1
4.9	3.1
0.97	23
1.5	0.22
2.6	0.43
1.5	0.24
3.9	0.4
1.4	0.098
1	0.22
0.6	0.46
1.8	0.21
0.55	0.12
0.85	0.17
1.2	0.2
1.1	0.45
5.1	0.54
0.6	1
4	0.79
3.9	1.5
1.8	0.32
1.3	0.59
1.6	0.22
3	0.8
2	0.2
1.9	0.65
3.2	0.39
5.3	0.21
1.1	0.44
2.7	0.26
0.95	2
3.4	0.68
1.5	5.5
1.1	0.42
3	4.6
1	2.3
3.9	0.73
3.3	0.29
0.99	0.31
1.2	0.69
1.4	0.71
4.6	0.42
0.62	0.8
0.71	1.7
0.51	0.15
4.1	6.9
2.6	5.2
3.5	0.88
2.5	1.1
0.79	1
1.8
2.4
0.82
4
4.7
3.8
1.2
1.6
2.8
5.1
3.3
2.4
5.2
2.8
3.1
6.1
1.1
0.96
6.4
4.4
4
3.2
0.61
0.95
1.5

## Sheet: Firing rate
WT	cKO
4.24	1.73
4.62	11.5
4.56	3.8
2.48	5.07
3.22	12.3
5.49	7.99
5.35	1.58
6.96	4.33
5.36	1.18
8.94	0.46
13.8	7.36
8.27	5.41
5.72	9.02
8.02	2.59
	12.1
