# Supplementary material for: The Cl--channel TMEM16A is involved in the generation of cochlear Ca2+ waves and promotes the refinement of auditory brainstem networks in mice
Source: eLife. 2022 Feb 7;11:e72251. doi: 10.7554/eLife.72251 (PMC8871368; doi:10.7554/eLife.72251)
Supplement: Figure 4—source data 2. [file elife-72251-fig4-data2.xlsx]

## Sheet: Q values
Q10 wt	Q10 cKO	Q20 wt	Q20 cKO	Q30 wt	Q30 cKO
3.4	2.2	2.8	2.1	2.4	1.6
4.7	2.5	3.6	2.3	3.2	1.3
4.9	2.7	4.6	2.4	3.5	2.2
4.8	3.5	4.2	2.6	2.8	2.4
3.2	2.7	3.1	2.6	3	1.9
18.5	5.2	17.6	3	17	2.4
4.7	1.7	4.7	1.6	4.6	1.1
19.8	4.5	14.5	3	9.6	2.5
12.6	1.3	12.5	1.2	4.8	1.2
5.5	3.6	4.3	2.9	3.4	1.8
5.4	10.3	4.7	6.1	3.4	4
2.7	3.7	2	3.2	1.9	2.8
6.4	6.2	4.3	4.4	4.2	3.5
3.9	22.3	3.7	11.3	3.4	9.4
10.2	5	9.1	5	8.8	4.8
3.8	5.5	3	4.9	2.9	4.8
6.3	2.9	3.8	2.8	3.6	2.5
21.8	6.7	20.1	5.7	18.8	3.8
5.4	6.4	4.3	5.5	3.6	3.6
8.4	4	6.4	3.7	5.6	3
22.1	7.2	8.1	2.9	6.1	2.6
8.8	3.7	5.6	3	3.5	2.8
4.7	7.9	4.2	6.5	4	5.5
8.7	2.5	5.7	2.3	4.1	2.1
6.6	8.7	5.3	7.5	3.5	6.6
	4		1.7		1.7
	2.7		1.8		1.7
	5.8		4.9		3.7
	9.3		3.3		2.2
	4.9		3.4		3.3
	5.8		4.8		3.5
	5.2		4.9		3.4

## Sheet: Thesholds
wt	cKO
18.7	36.5
5.4	30.1
3	36.7
7	37.1
1	30
0	28.6
1.3	37
0	18.9
0	39.9
4.4	22
2.1	1.2
13.1	2.6
0.2	0.8
5.4	0
9.7	2.3
0.6	0.7
0.2	48.3
0	2.4
1.6	1.2
0	23.3
0	0
-1	2.5
-3.6	0
-3.6	10
-8.4	0
	29.1
	-7.3
	-0.9
	11.9
	14
	1.8
	-0.7

## Sheet: firing rate at 0-70 Db SPL
wt 0 dB SPL	wt 10 dB SPL	wt 20 dB SPL	wt 30 dB SPL	wt 40 dB SPL	wt 50 dB SPL	wt 60 dB SPL	wt 70 dB SPL	cKO 0 dB SPL	cKO 10 dB SPL	cKO 20 dB SPL	cKO 30 dB SPL	cKO 40 dB SPL	cKO 50 dB SPL	cKO 60 dB SPL	cKO 70 dB SPL
12.502	20.003	47.508	127.521	215.036	217.536	200.033	217.536	32.505	32.505	42.507	45.008	82.514	135.023	150.025	155.026
17.503	25.004	177.53	245.041	270.045	260.043	247.541	217.536	10.002	12.502	7.501	12.502	75.013	142.524	155.026	175.029
0	10.002	85.014	147.525	180.03	160.027	195.033	162.527	60.01	65.011	57.51	60.01	77.513	77.513	82.514	102.517
70.012	107.518	137.523	185.031	167.528	162.527	175.029	167.528	65.011	65.011	45.008	35.006	97.516	150.025	170.028	157.526
30.005	105.018	177.53	187.531	190.032	182.53	200.033	162.527	10.002	20.003	10.002	17.503	175.029	175.029	190.032	197.533
82.514	210.035	252.542	245.041	262.544	227.538	250.042	245.041	12.502	7.501	7.501	27.505	110.018	160.027	165.028	155.026
77.513	200.033	237.54	245.041	230.038	240.04	232.539	230.038	7.501	2.5	2.5	10.002	17.503	67.511	187.531	202.534
90.015	197.533	270.045	272.545	260.043	285.047	265.044	257.543	10.002	5.001	30.005	115.019	155.026	170.028	195.033	205.034
7.501	205.034	242.54	262.544	267.545	252.542	265.044	275.046	2.5	2.5	0	0	0	45.008	190.032	242.54
82.514	127.521	190.032	212.535	205.034	192.532	197.533	215.036	44.007	44.007	46.008	34.006	32.005	64.011	108.018	128.021
65.011	170.028	275.046	260.043	257.543	265.044	257.543	257.543	17.503	27.505	32.505	125.021	242.54	222.537	187.531	145.024
45.008	62.51	180.03	227.538	252.542	257.543	235.039	237.54	85.014	140.023	237.54	262.544	235.039	227.538	225.037	207.535
40.007	195.033	265.044	280.047	282.547	262.544	255.042	252.542	42.507	152.525	207.535	232.539	245.041	232.539	215.036	212.535
30.005	90.015	120.02	170.028	210.035	210.035	260.043	240.04	142.524	230.038	247.541	240.04	222.537	250.042	217.536	217.536
0.2	22.004	62.01	76.013	82.014	102.017	138.023	140.023	120.02	145.024	180.03	140.023	85.014	40.007	35.006	35.006
2	58.01	206.034	250.042	290.048	266.044	288.048	284.047	7.501	35.006	127.521	167.528	195.033	220.037	225.037	247.541
5.001	37.506	130.022	187.531	207.535	212.535	222.537	227.538	7	10.002	20.003	40.007	70.012	50.008	200.033	210.035
62.51	195.033	247.541	252.542	237.54	220.037	250.042	242.54	32.505	80.013	240.04	297.55	280.047	292.549	295.049	287.548
37.506	97.516	245.041	257.543	275.046	262.544	245.041	245.041	5.001	55.009	165.028	230.038	245.041	227.538	265.044	270.045
124.021	214.036	376.063	360.06	400.067	356.059	372.062	394	0	0	0	12.502	172.529	252.542	252.542	275.046
80.013	275.046	285.047	297.55	300.05	270.045	272.545	250.042	90.015	110.018	125.021	107.518	105.018	110.018	122.52	122.52
70.012	158.026	262.044	270.045	250.042	234.039	240.04	242.04	20.003	157.526	255.042	252.542	240.04	247.541	240.04	235.039
98.016	246.041	262.044	284.047	282.047	266.044	236.039	266.044	145.024	180.03	197.533	202.534	205.034	190.032	195.033	187.531
108.018	170.028	146.024	186.031	174.029	152.025	172.029	146.024	40.007	47.508	182.53	192.532	222.537	280.047	277.546	237.54
138.023	184.031	190.032	192.032	194.032	190.032	186.031	204.034	80.013	202.534	210.035	210.035	215.036	212.535	185.031	197.533
								4.001	2	4.001	4.001	138.023	234.039	254.042	272.045
								124.021	138.023	144.024	142.024	122.02	140.023	152.025	152.025
								86.014	124.021	122.02	120.02	116.019	112.019	120.02	134.022
								0	3.334	13.336	236.706	293.382	336.723	316.719	280.047
								100.017	84.014	96.016	96.016	102.017	114.019	98.016	100.017
								104.017	172.029	204.034	194.032	202.034	188.031	192.032	186.031
								115.019	200.033	240.04	257.543	260.043	257.543	265.044	225.037

## Sheet: Max firing rate
wt	cKO
230	155
290	175
248	110
185	173
213	200
265	175
250	213
285	205
293	280
215	128
285	248
285	263
293	258
330	250
184	180
290	248
245	270
263	310
275	270
400	285
305	143
276	265
294	235
188	293
204	248
	302
	162
	136
	393
	116
	212
	265
