# Supplementary material for: The Cl--channel TMEM16A is involved in the generation of cochlear Ca2+ waves and promotes the refinement of auditory brainstem networks in mice
Source: eLife. 2022 Feb 7;11:e72251. doi: 10.7554/eLife.72251 (PMC8871368; doi:10.7554/eLife.72251)
Supplement: Figure 5—figure supplement 1—source data 1. [file elife-72251-fig5-figsupp1-data1.xlsx]

## Sheet: AP Eliciting Distance
WT mediolateral distance (µm)		20	WT dorsoventrall distance (µm)	20
		20		20
		20		20
		20		25
		15		15
		20		20
	average	19.1667		20
	StdeV	2.04124		3.16228
	SEM	0.83316		1.29073
