# Supplementary material for: The Cl--channel TMEM16A is involved in the generation of cochlear Ca2+ waves and promotes the refinement of auditory brainstem networks in mice
Source: eLife. 2022 Feb 7;11:e72251. doi: 10.7554/eLife.72251 (PMC8871368; doi:10.7554/eLife.72251)
Supplement: Figure 5—source data 1. [file elife-72251-fig5-data1.xlsx]

## Sheet: Explanation
This workbook contains data from p9-p11 TMEM16A KO mice and WT mice used to reconstruct MNTB input maps and MNTB input widths as shown in the MS "The Cl--channel TMEM16A controls the generation of cochlear Ca2+ waves and promotes the refinement of auditory brainstem networks" by A. Maul et al.
Data were acquired by
Worksheet "Input Map" contains data shown in Figure 5. Column B and C contain the MNTB input area analyzed from wildtype and TMEM16A mice, respectively. Each line in column B represents data obtained from one mouse examined (n=10 WT mice and n=10 cKO mice).
Worksheet "Input Width" contains data shown in Figure 5. Column B and C contain the MNTB input width analyzed from wildtype and TMEM16A mice, respectively. Each line in column B represents data obtained from one mouse examined (n=10 WT mice and n=10 cKO mice; same mice as for analysis of input maps).
*Exemplary MNTBs shown in Figure 5A are highlighted in yellow.

## Sheet: Input Map
	WT MNTB Input Area (%)	cKO MNTB Input Area (%)
	14.6479	18.8507
	7.91672	25.2874
	12.673	26.9892
	9.49299	21.1407
	15.3304	28.4255
	4.97552	2.88172
	11.0583	22.9041
	10.2506	15.8387
	4.66908	12.4667
	8.19519	25.0982
Average	9.92097	19.9883
STDEV	3.64844	7.83116
SEM	1.15457	2.47822
T-test (unpaired, 2-tailed, equal variance)	0.00169445

## Sheet: Input Width
	WT MNTB Input Width (%)	cKO MNTB Input Width (%)
	15.5102	35
	23.75	14.25
	30.8108	61.75
	36.1905	46.3415
	16.5217	45.2381
	19.3878	11.5152
	14.6154	41.3043
	9.5	38
	11.4	21.1111
	5.27778	46.0606
Average	18.2964	36.0571
Stdev	9.5837	15.9301
SEM	3.03281	5.04118
T-test (unpaired, 2-tailed, equal variance)	0.00734084
